# Supplementary material for: α/γ4-Hybrid peptide helices: synthesis, crystal conformations and analogy with the α-helix
Source: Royal Society of Chemistry journal article supplement (doi:10.1039/c2cc32911e), 2012-01-01

## Supporting Information

# $\alpha/\gamma^4$ -Hybrid Peptide Helices: Synthesis, Crystal Conformations and Analogy with $\alpha$ -Helix

Anupam Bandyopadhyay, Sandip V. Jadhav and Hosahudya N. Gopi\*

Department of Chemistry, Indian Institute of Science Education and Research, Dr. Homi Bhabha Road, Pune-411021  
India. E-mail: [hn.gopi@iiserpune.ac.in](mailto:hn.gopi@iiserpune.ac.in)

|                                                                                                                                                                                                                                                                                 |     |
|---------------------------------------------------------------------------------------------------------------------------------------------------------------------------------------------------------------------------------------------------------------------------------|-----|
| List of contents.....                                                                                                                                                                                                                                                           | S1  |
| X-Ray crystal structure of                                                                                                                                                                                                                                                      |     |
| Boc-Aib- $\gamma^4$ Phe-Leu- $\gamma^4$ Phe-OEt ( <b>P1</b> ) .....                                                                                                                                                                                                             | S2  |
| Boc-Aib- $\gamma^4$ Phe-Leu- $\gamma^4$ Phe-Aib-dgF-OEt ( <b>P2</b> ) .....                                                                                                                                                                                                     | S4  |
| Boc-Aib- $\gamma^4$ Phe-Lue- $\gamma^4$ Phe-Aib- $\gamma^4$ Phe-OEt ( <b>P3</b> ) .....                                                                                                                                                                                         | S6  |
| Torsional angle Tables for <b>P1</b> , <b>P2</b> and <b>P3</b> .....                                                                                                                                                                                                            | S7  |
| Hydrogen-Bond Parameters in Peptides <b>P1</b> , <b>P2</b> and <b>P3</b> .....                                                                                                                                                                                                  | S10 |
| General Experimental Details.....                                                                                                                                                                                                                                               | S10 |
| Crystal structure analysis of <b>P1</b> , <b>P2</b> and <b>P3</b> .....                                                                                                                                                                                                         | S10 |
| Synthesis of ( <i>S</i> , <i>E</i> )-ethyl 4-( <i>tert</i> -butoxycarbonylamino)-5-phenylpent-2-enoate.....                                                                                                                                                                     | S12 |
| Synthesis of Dipeptides Boc-Aib-dgF-OEt and Boc-Leu-dgF-OEt.....                                                                                                                                                                                                                | S13 |
| Synthesis of $\alpha$ /vinylogous hybrid tetrapeptide Boc-Aib-dgF-Leu-dgF-OEt.....                                                                                                                                                                                              | S16 |
| Transformation of $\alpha$ /Vinylogous hybrid peptide (Boc-Aib-dgPhe-Leu-dgPhe-OEt) to saturated $\alpha/\gamma^4$ -hybrid peptide (Boc-Aib- $\gamma^4$ Phe-Leu- $\gamma^4$ Phe-OEt) ( <b>P1</b> ).....                                                                         | S18 |
| Synthesis of Hexapeptide (Boc-Aib- $\gamma^4$ Phe-Leu- $\gamma^4$ Phe-Aib-dgF-OEt) ( <b>P2</b> ) .....                                                                                                                                                                          | S18 |
| Transformation of $\alpha$ /Vinylogous hybrid hexapeptide (Boc-Aib- $\gamma^4$ Phe-Leu- $\gamma^4$ Phe-Aib-dgF-OEt) ( <b>P2</b> ) to its saturated hybrid $\gamma^4$ -peptide analogue (Boc-Aib- $\gamma^4$ Phe-Leu- $\gamma^4$ Phe-Aib- $\gamma^4$ Phe-OEt) ( <b>P3</b> )..... | S21 |
| References.....                                                                                                                                                                                                                                                                 | S22 |
| $^1\text{H}$ , $^{13}\text{C}$ and MALDI-TOF Mass Data.....                                                                                                                                                                                                                     | S23 |

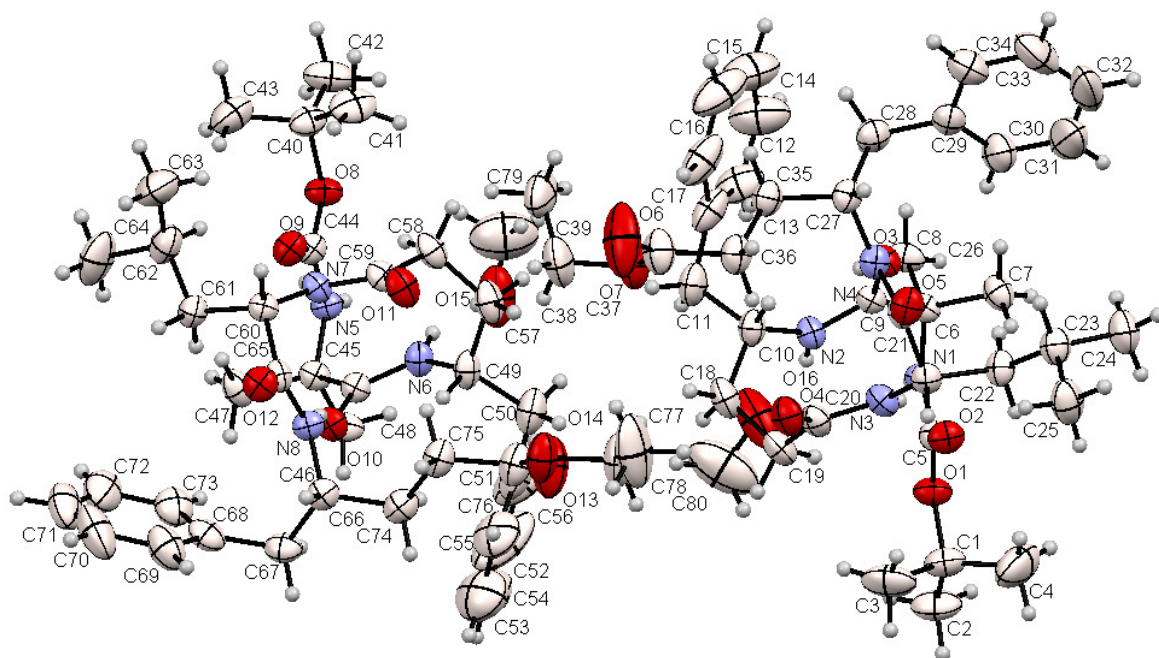

A

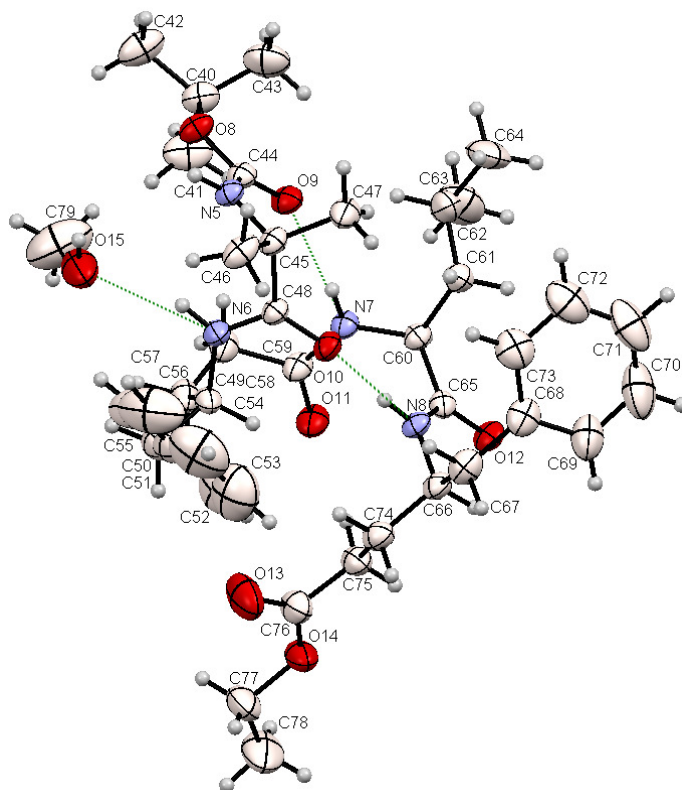

B

**Figure 1.** The ORTEP diagram of  $\alpha/\gamma^4$ -hybrid tetrapeptide Boc-Aib- $\gamma^4$ Phe-Leu- $\gamma^4$ Phe-OEt (**P1**). Two independent peptide molecules (**a** and **b**) along with two methanol molecules present in asymmetric unit is shown in **A**. H-atoms are not labeled for clarity. Molecule **a** is shown separately in **B**. Two intramolecular hydrogen bonds and one intermolecular H-bond with MeOH are represented in dotted lines.

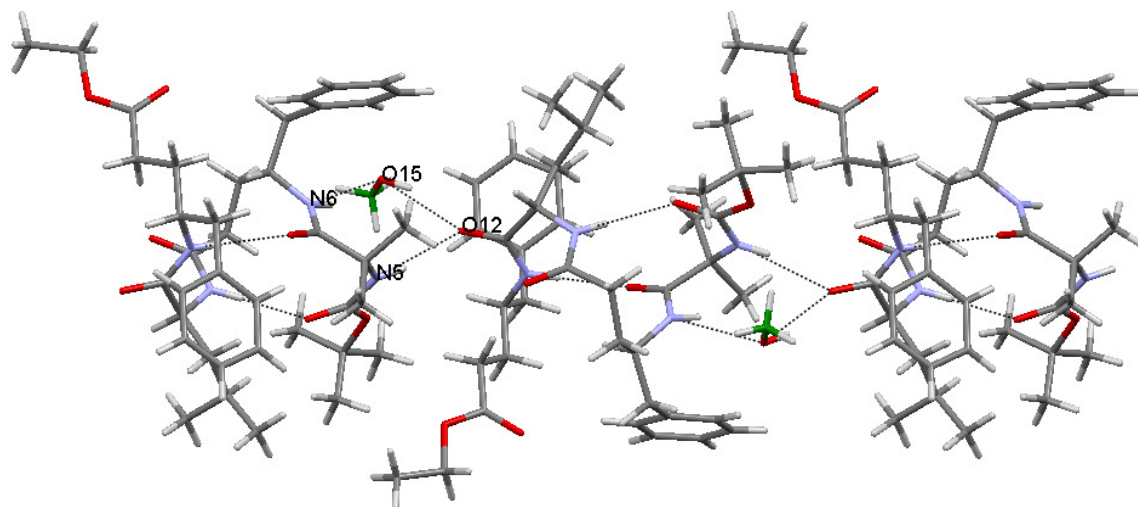

**Figure2** : The two independent helices (**a** and **b**) in asymmetric unit are connected to the other helices through intermolecular H-bonding in a head-to-tail fashion. The solvent methanol is playing a crucial role in interconnection the two helices through intermolecular H-bonding. Donor atom N5 of **a** is interacting directly with acceptor O12 atom of another helix (**a**) through intermolecular H-bonding [C=O(12)···NH(5); NH···O dist. 2.11 Å, N···O dist 2.96 Å,  $\angle$ N-H···O = 167°]. In addition, the donor atom N6 is involved in the intermolecular H-bonding with O15 of the methanol [C-O(15)···NH(6); NH···O dist. 2.17 Å, N···O dist 2.99 Å,  $\angle$ N-H···O = 159°] and the acceptor O12 is interacted with donor OH group of methanol [C=O(15)···OH(15); OH···O dist. 1.96 Å, N···O dist 2.94 Å]. The carbon atom of methanol molecule is highlighted in green color. Similar pattern of intermolecular H-bonding is observed in the molecule **b**.

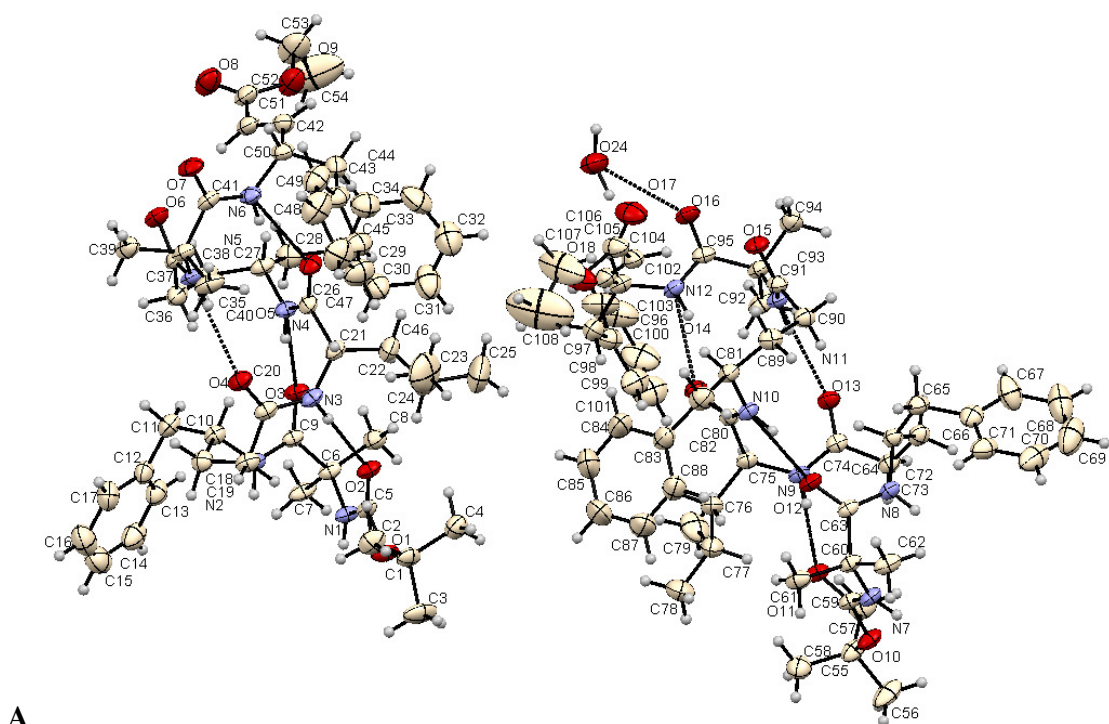

A

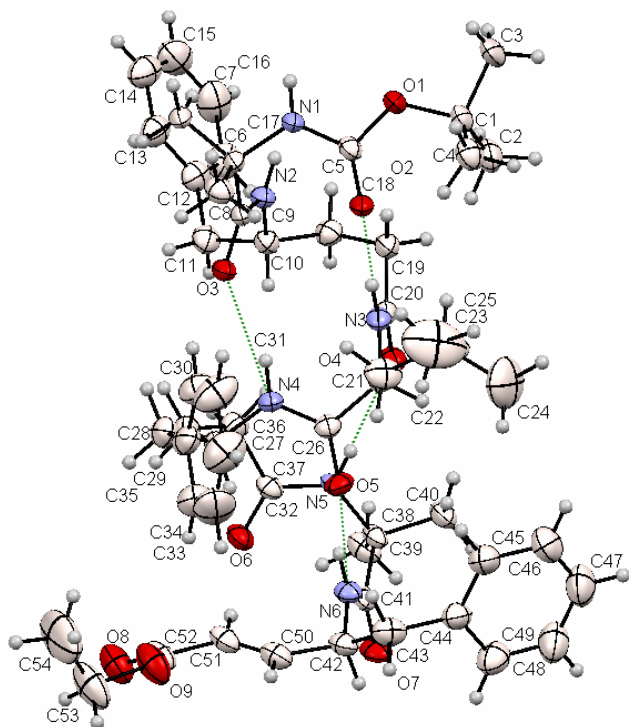

B

**Figure 3.** The ORTEP diagram of  $\alpha/\gamma^4$ -hybrid hexapeptide Boc-Aib- $\gamma^4$ Phe-Leu- $\gamma^4$ Phe-Aib-dgF-OEt (**P2**). **A.** Two independent peptide molecules (**a** and **b**) (along with a solvent water molecule) are present in the asymmetric unit with slight variation in the torsional values. Molecule **a** is shown separately in **B**. H-atoms are not labeled for clarity. Four intramolecular H-bonds are represented in dotted lines. The two helices are independently interconnected with the other helices in a head-to-tail fashion through four

intermolecular H-bonds, NH(7)---O(6) [NH---O dist. 2.132 Å, N---O dist. 2.927 Å and  $\angle$ N-H...O = 154°], NH(8)---O(8) [NH---O dist. 2.235 Å, N---O dist. 3.062 Å and  $\angle$ N-H...O = 161°], NH(1)---O15 [NH---O dist. 2.210 Å, N---O dist. 2.921 Å and  $\angle$ N-H...O = 155°], and NH(2)---O17 [NH---O dist. 2.225 Å, N---O dist. 3.061 Å and  $\angle$ N-H...O = 164°].

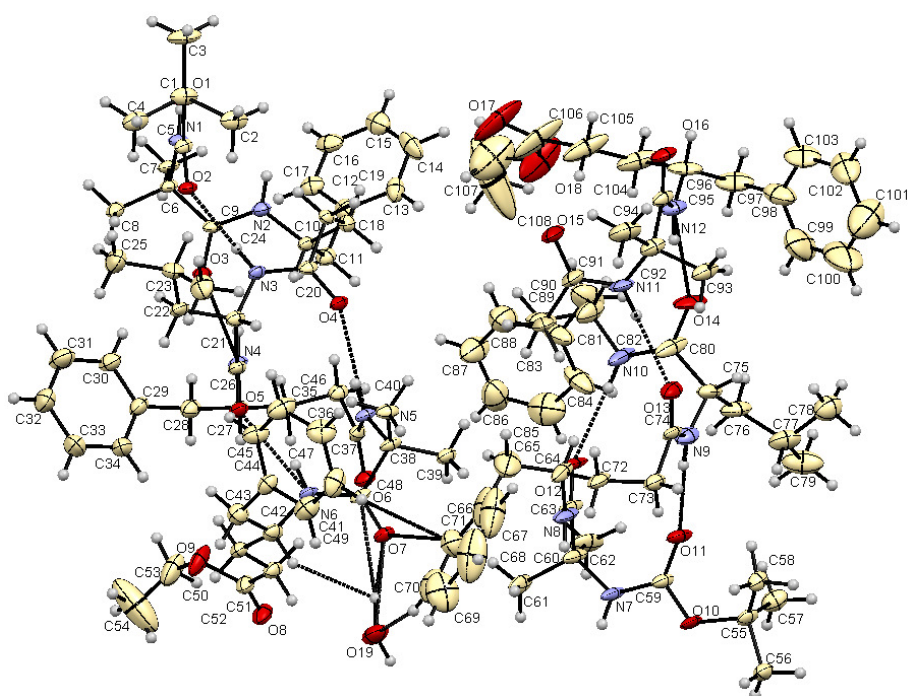

A

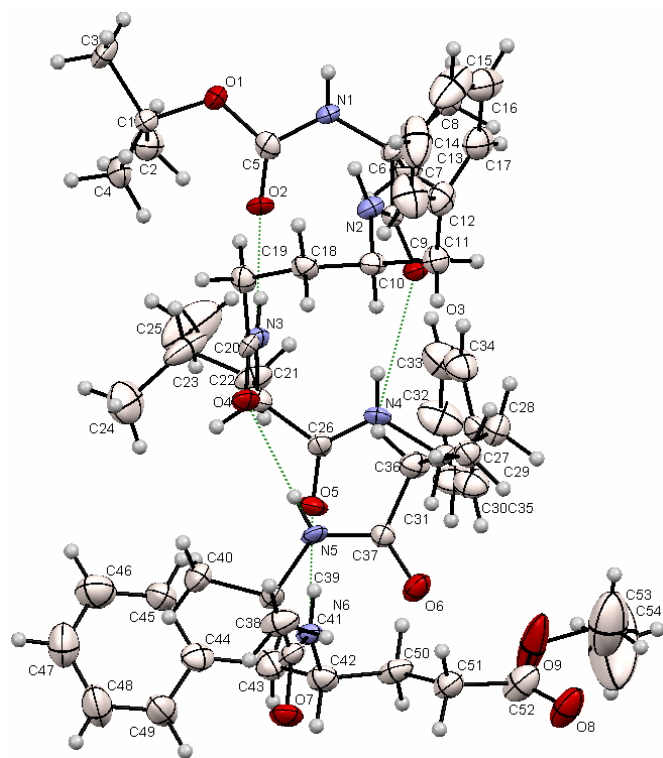

B

**Figure 3.** The ORTEP diagram of  $\alpha\gamma^4$ -hybrid hexapeptide Boc-Aib- $\gamma^4$ Phe-Leu- $\gamma^4$ Phe-Aib- $\gamma^4$ Phe-OEt (**P3**). **A.** Two peptide molecules (**a** and **b**) (along with a solvent water molecule) are present in the asymmetric unit with slight variation in the torsional values. Peptide molecules displayed antiparallel orientation in the asymmetric unit. In contrast to **P1** and **P2**, the two peptide molecules in **P3** are interconnected through the intermolecular C-H $\cdots$  $\pi$  interaction between the aromatic side-chains of  $\gamma^4$ Phe2 (**a**) and  $\gamma^4$ Phe4 (**b**) [C-H $\cdots$  $\pi$  dist. 2.898 Å] along with water mediated CH(70) $\cdots$ O(19) [CH $\cdots$ O dist. 2.457 Å, C $\cdots$ O dist. 3.264 Å and  $\angle$ C-H $\cdots$ O = 145°] and O(7) $\cdots$ H-O(19) [O $\cdots$ OH dist. 1.764 Å, O $\cdots$ O dist.

2.807 Å and  $\angle\text{O-H}\cdots\text{O} = 170^\circ$ ] H-bonds. Molecule **a** is shown separately in **B**. H-atoms are not labeled for clarity. Four intramolecular hydrogen bonds are represented in dotted lines. The two peptides (**a** and **b**) in the asymmetric unit are independently interacting with other helices in a head-to-tail fashion through two intermolecular H-bonds. In the molecule **a**, NH(1)---O(6) [NH---O dist. 2.114 Å, N---O dist. 2.889 Å and  $\angle\text{N-H}\cdots\text{O} = 150^\circ$ ] and NH(2)---O(8) [NH---O dist. 2.151 Å, N---O dist. 2.959 Å and  $\angle\text{N-H}\cdots\text{O} = 156^\circ$ ] are involved in the intermolecular H-bonding, while in the molecule **b**, NH(7)---O(15) [NH---O dist. 2.226 Å, N---O dist. 3.050 Å and  $\angle\text{N-H}\cdots\text{O} = 160^\circ$ ] and NH(8)---O(17) [NH---O dist. 2.069 Å, N---O dist. 2.882 Å and  $\angle\text{N-H}\cdots\text{O} = 157^\circ$ ] are involved in the intermolecular H-bonding.

**Table1: Backbone torsional variables of  $\alpha/\gamma^4$ -hybrid peptide Boc-Aib- $\gamma^4$ Phe-Leu- $\gamma^4$ Phe-OEt (P1).**

(Two molecules are present in asymmetric unit)

Peptide (a)

| Resd.             | $\phi$  | $\theta_1$ | $\theta_2$ | $\psi$  | $\omega$ |
|-------------------|---------|------------|------------|---------|----------|
| Aib(1)            | -59.48  | -          | -          | -37.51  | -175.07  |
| $\gamma^4$ Phe(2) | -122.77 | 47.54      | 66.41      | -115.34 | -175.76  |
| Leu(3)            | -61.15  | -          | -          | -36.99  | -176.52  |
| $\gamma^4$ Phe(4) | -115.35 | 63.22      | -176.60    | -142.78 | -        |

Peptide (b)

| Resd.             | $\phi$  | $\theta_1$ | $\theta_2$ | $\psi$  | $\omega$ |
|-------------------|---------|------------|------------|---------|----------|
| Aib(1)            | -60.70  | -          | -          | -35.07  | -175.64  |
| $\gamma^4$ Phe(2) | -129.83 | 52.39      | 60.28      | -107.50 | -174.99  |
| Leu(3)            | -64.65  | -          | -          | -38.58  | 178.48   |
| $\gamma^4$ Phe(4) | -102.04 | 61.43      | 179.75     | 65.05   | -        |

Mean torsional values of two peptides are tabulated with e.s.d. value

| Resd.             | $\phi$       | $\theta_1$  | $\theta_2$   | $\psi$        | $\omega$      |
|-------------------|--------------|-------------|--------------|---------------|---------------|
| Aib(1)            | -60.09(44)   | -           | -            | -36.29(1.72)  | -175.35(0.40) |
| $\gamma^4$ Phe(2) | -126.3(4.99) | 49.96(3.42) | 63.345(4.33) | -111.42(5.54) | -175.37(0.54) |
| Leu(3)            | -62.9(2.47)  | -           | -            | -37.78(1.12)  | 177.5(1.38)   |
| $\gamma^4$ Phe(4) | -102.04(41)  | 62.23(1.26) | -            | -             | -             |

**Table 2: Backbone torsional variables of  $\alpha/\gamma^4$ -hybrid peptide Boc-Aib- $\gamma^4$ Phe-Leu- $\gamma^4$ Phe-Aib-dgF-OEt (P2).**

(Two molecules are present in the asymmetric unit)  
 Peptide (a)

| Resd.             | $\phi$  | $\theta_1$ | $\theta_2$ | $\psi$  | $\omega$ |
|-------------------|---------|------------|------------|---------|----------|
| Aib(1)            | -55.25  | -          | -          | -49.24  | -174.84  |
| $\gamma^4$ Phe(2) | -137.64 | 61.29      | 59.28      | -114.27 | -175.38  |
| Leu(3)            | -65.44  | -          | -          | -33.59  | -175.55  |
| $\gamma^4$ Phe(4) | -121.41 | 48.11      | 64.10      | -122.71 | -168.96  |
| Aib(5)            | -62.78  | -          | -          | -32.64  | -171.81  |
| dgPhe(6)          | -113.38 | 23.23      | 174.13     | 27.93   | -        |

Peptide (b)

| Resd.             | $\phi$  | $\theta_1$ | $\theta_2$ | $\psi$  | $\omega$ |
|-------------------|---------|------------|------------|---------|----------|
| Aib(1)            | -56.79  | -          | -          | -49.70  | -175.26  |
| $\gamma^4$ Phe(2) | -138.09 | 61.71      | 58.58      | -115.88 | -175.85  |
| Leu(3)            | -64.09  | -          | -          | -33.93  | -173.55  |
| $\gamma^4$ Phe(4) | -125.46 | 49.59      | 62.03      | -117.27 | -171.25  |
| Aib(5)            | -60.20  | -          | -          | -33.37  | -173.88  |
| dgPhe(6)          | -112.91 | 26.05      | 172.21     | 31.11   | -        |

Mean torsional values of two peptides are tabulated with e.s.d. values

| Resd.             | $\phi$        | $\theta_1$  | $\theta_2$   | $\psi$        | $\omega$      |
|-------------------|---------------|-------------|--------------|---------------|---------------|
| Aib(1)            | -55.52(1.79)  | -           | -            | -49.47(0.32)  | -175.05(0.29) |
| $\gamma^4$ Phe(2) | -137.86(0.31) | 61.5(0.29)  | 58.93(0.49)  | -115.07(1.13) | -175.61(0.33) |
| Leu(3)            | -64.76(0.95)  | -           | -            | -33.76(0.24)  | -174.55(1.41) |
| $\gamma^4$ Phe(4) | -123.43(2.86) | 48.85(1.04) | 63.06(1.46)  | -119.99(3.84) | -170.10(1.61) |
| Aib(5)            | -61.49(1.82)  | -           | -            | -33(0.51)     | -172.84(1.46) |
| dgPhe(6)          | -113.14(0.33) | 24.64(1.99) | 173.17(1.35) | 29.52(2.24)   | -             |



**Table 3: Backbone torsional variables of  $\alpha/\gamma^4$ -hybrid peptide Boc-Aib- $\gamma^4$ Phe-Leu- $\gamma^4$ Phe-Aib- $\gamma^4$ Phe-OEt (P3).**

(Two molecules are present in asymmetric unit)

Peptide (a)

| Resd.          | $\phi$  | $\theta_1$ | $\theta_2$ | $\psi$  | $\omega$ |
|----------------|---------|------------|------------|---------|----------|
| Aib            | -59.11  | -          | -          | -42.85  | -175.51  |
| $\gamma^4$ Phe | -137.25 | 56.85      | 61.07      | -110.55 | -175.76  |
| Leu            | -72.41  | -          | -          | -24.81  | -179.62  |
| $\gamma^4$ Phe | -122.42 | 44.87      | 65.90      | -122.94 | -170.73  |
| Aib            | -58.51  | -          | -          | -35.63  | -170.85  |
| $\gamma$ Phe   | -121.42 | 59.01      | 176.48     | 23.89   | -        |

Peptide (b)

| Resd.          | $\phi$  | $\theta_1$ | $\theta_2$ | $\psi$  | $\omega$ |
|----------------|---------|------------|------------|---------|----------|
| Aib            | -62.21  | -          | -          | -47.58  | -179.35  |
| $\gamma^4$ Phe | -132.14 | 62.15      | 60.26      | -119.69 | -173.50  |
| Leu            | -66.80  | -          | -          | -33.58  | -173.54  |
| $\gamma^4$ Phe | -141.38 | 49.42      | 61.97      | -103.58 | -173.86  |
| Aib            | -62.31  | -          | -          | -39.91  | -179.29  |
| $\gamma^4$ Phe | -104.91 | 56.04      | 179.34     | 20.37   | -        |

Mean torsional values of two peptides are tabulated with e.s.d. values

| Resd.             | $\phi$         | $\theta_1$  | $\theta_2$   | $\psi$         | $\omega$      |
|-------------------|----------------|-------------|--------------|----------------|---------------|
| Aib(1)            | -60.66(2.19)   | -           | -            | -45.21(3.34)   | -177.43(2.71) |
| $\gamma^4$ Phe(2) | -134.69(3.61)  | 59.17(3.28) | 60.66(0.57)  | -115.12(6.46)  | -174.63(1.59) |
| Leu(3)            | -69.60(3.96)   | -           | -            | -29.19(6.20)   | -176.58(4.29) |
| $\gamma^4$ Phe(4) | -131.9(13.40)  | 47.14(3.21) | 63.93(2.77)  | -113.26(13.68) | -172.29(2.21) |
| Aib(5)            | -60.41(2.68)   | -           | -            | -37.77(3.02)   | -175.07(5.96) |
| dgPhe(6)          | -113.16(11.67) | 57.52(2.1)  | 177.91(2.02) | 22.13(2.48)    | -             |

**Table 4: Intramolecular Hydrogen-Bond Parameters in Peptides P1, P2 and P3**

| Type of H-bonds                                 | Donar (D) | Acceptor (A) | D...A (Å)   | D-H...A (Å) | ∠N-H...O (deg) |
|-------------------------------------------------|-----------|--------------|-------------|-------------|----------------|
| <b>Boc-Aib-γPhe-Leu-γPhe-OEt (G3)</b>           |           |              |             |             |                |
| 1←4                                             | N3        | O0(Boc)      | 2.95(0.007) | 2.11(0.02)  | 163.63(4.69)   |
| 1←4                                             | N4        | O1           | 2.89(0.01)  | 2.05(0.02)  | 163.48(3.62)   |
| <b>Boc-Aib-γPhe-Leu-γPhe-Aib-dgPhe-OEt (D4)</b> |           |              |             |             |                |
| 1←4                                             | N3        | O0(Boc)      | 2.89(0.003) | 2.03(0.003) | 175.95(0.57)   |
| 1←4                                             | N4        | O1           | 2.96(0.01)  | 2.15(0.01)  | 155.76(0.86)   |
| 1←4                                             | N5        | O2           | 3.04(0.01)  | 2.19(0.02)  | 171.71(0.72)   |
| 1←4                                             | N6        | O3           | 2.8(0.007)  | 2.00(0.007) | 153.42(0.84)   |
| <b>Boc-Aib-γPhe-Leu-γPhe-Aib-γPhe-OEt (G5)</b>  |           |              |             |             |                |
| 1←4                                             | N3        | O0(Boc)      | 2.86(0.001) | 2.00(0.007) | 172.25(2.3)    |
| 1←4                                             | N4        | O1           | 2.98(0.06)  | 2.17(0.01)  | 158.85(12.92)  |
| 1←4                                             | N5        | O2           | 2.98(0.004) | 2.13(0.04)  | 170.17(3.09)   |
| 1←4                                             | N6        | O3           | 2.85(0.06)  | 2.05(0.04)  | 154.4(4.06)    |

### General Experimental Details

All amino acids, DIPEA, TFA, triphenylphosphine were purchased from Aldrich. THF, DCM, DMF, NaOH were purchased from Merck. Ethyl bromoacetate, MeNH<sub>2</sub> solution in water, HOSu, HBTU, HOBT, EtOAc, Pet-ether (60-80 °C) were obtained from spectrochem and used without further purification. THF and DIPEA were dried over sodium and distilled immediately prior to use. Column chromatography was performed on Merck silica gel (120-200 mesh). The <sup>1</sup>H and <sup>13</sup>C spectra were recorded on Jeol 400 MHz (or 100 MHz for <sup>13</sup>C) and Bruker 500 MHz using residual solvents signals as an internal reference (CDCl<sub>3</sub> δ<sub>H</sub>, 7.26 ppm and δ<sub>C</sub>, 77.00). The chemical shifts (δ) are reported in ppm and coupling constants (*J*) in Hz. Mass was recorded on MALDI-TOF/TOF (Applied Biosciences) and CD was recorded on JASCO (*J*-815). X-Ray data was collected on a Bruker AXS APEX II CCD Duo diffractometer (operated at 1500 W power:50 kV, 30 mA) with Mo K<sub>α</sub> (λ = 0.71073 Å) radiation.

### Crystal structure analysis

**Crystal structure analysis of (Boc-Aib-γ<sup>4</sup>Phe-Leu-γ<sup>4</sup>Phe-OEt) P1:** Crystals of peptide were grown by slow evaporation from a solution of methanol. A single crystal (0.42 × 0.35 × 0.32 mm) was mounted in a loop with a small amount of the mother liquor. The X-ray data were collected at 100 K temperature on a

Bruker AXS SMART APEX II CCD Duo diffractometer using MoK $\alpha$  radiation ( $\lambda = 0.71073 \text{ \AA}$ ),  $\omega$ -scans ( $2\theta = 56.56^\circ$ ), for a total number of 14908 independent reflections. Space group  $P2(1)$ ,  $a = 10.132(2)$ ,  $b = 20.141(4)$ ,  $c = 21.010(4) \text{ \AA}$ ,  $\alpha = 90.00$ ,  $\beta = 99.384(5)$ ,  $\gamma = 90.00$ ,  $V = 4230.1(14) \text{ \AA}^3$ , Monoclinic  $P$ ,  $Z=4$  for chemical formula  $(C_{39}H_{58}N_4O_7).CH_4O$ , with two molecule in asymmetric unit;  $\rho_{\text{calcd}} = 1.141 \text{ g cm}^{-3}$ ,  $\mu = 0.079 \text{ mm}^{-1}$ ,  $F(000) = 1576$ ,  $R_{\text{int}} = 0.0699$ . The structure was obtained by direct methods using SHELXS-97.<sup>1</sup> All non-hydrogen atoms were refined anisotropically. The hydrogen atoms were fixed geometrically in the idealized position and refined in the final cycle of refinement as riding over the atoms to which they are bonded. The final  $R$  value was 0.0574 ( $wR2 = 0.1331$ ) for 6991 observed reflections ( $F_o \geq 4\sigma(|F_o|)$ ) and 958 variables,  $S = 0.929$ . The largest difference peak and hole were 0.256 and  $-0.212 \text{ e \AA}^{-3}$ , respectively. Strange C-O-H Geometry (C-O .LT. 1.25 Ang.....O15) is reported in check cif. This is due to the disordered over two sites occupancy of oxygen atom (O15) in methanol solvent molecule.

**Crystal structure analysis of (Boc-Aib- $\gamma^4$ Phe-Leu- $\gamma^4$ Phe-Aib-dgF-OEt) P2:** Crystals of peptide were grown by slow evaporation from a solution of ethyl acetate and hexane. A single crystal ( $0.35 \times 0.28 \times 0.16 \text{ mm}$ ) was mounted in a loop with a small amount of the mother liquor. The X-ray data were collected at 100 K temperature on a Bruker AXS SMART APEX II CCD Duo diffractometer using MoK $\alpha$  radiation ( $\lambda = 0.71073 \text{ \AA}$ ),  $\omega$ -scans ( $2\theta = 56.56^\circ$ ), for a total number of 28846 independent reflections. . Space group  $P2(1)$ ,  $a = 14.850(6)$ ,  $b = 18.173(7)$ ,  $c = 24.075(9) \text{ \AA}$ ,  $\alpha = 90.00$ ,  $\beta = 107.254(7)$ ,  $\gamma = 90.00$ ,  $V = 6204(4) \text{ \AA}^3$ , Monoclinic  $P$ ,  $Z = 4$  for chemical formula  $2(C_{54}H_{76}N_6O_9).H_2O$ , with two molecule in asymmetric unit;  $\rho_{\text{calcd}} = 1.029 \text{ g cm}^{-3}$ ,  $\mu = 0.071 \text{ mm}^{-1}$ ,  $F(000) = 2072$ ,  $R_{\text{int}} = 0.0660$ . The structure was obtained by direct methods using SHELXS-97.<sup>1</sup> All non-hydrogen atoms were refined anisotropically. The hydrogen atoms were fixed geometrically in the idealized position and refined in the final cycle of refinement as riding over the atoms to which they are bonded. The final  $R$  value was 0.0576 ( $wR2 = 0.1400$ ) for 13821 observed reflections ( $F_o \geq 4\sigma(|F_o|)$ ) and 1272 variables,  $S = 0.788$ . The largest difference peak and hole were 0.215 and  $-0.197 \text{ e \AA}^{-3}$ , respectively.

There were some partially occupied solvent molecules also present in the asymmetric unit. A significant amount of time was invested in identifying and refining the disordered molecules. Bond length restraints were applied to model the molecules but the resulting isotropic displacement coefficients suggested the molecules were highly mobile. Option SQUEEZE of program PLATON<sup>2</sup> was used to correct the diffraction data for diffuse scattering effects and to identify the solvent molecule. PLATON calculated the upper limit of volume that can be occupied by the solvent to be  $1149.4 \text{ \AA}^3$ , or 18.5% of the unit cell volume. The program calculated 60 electrons in the unit cell for the diffuse species. No data are given for the diffusely scattering species. Output of SQUEEZE reports are appended in cif file P2.

**Crystal structure analysis of (Boc-Aib- $\gamma^4$ Phe-Leu- $\gamma^4$ Phe-Aib- $\gamma^4$ Phe-OEt) P3:** Crystals of peptide were grown by slow evaporation from a solution of acetone. A single crystal (0.42 × 0.32 × 0.18 mm) was mounted in a loop with a small amount of the mother liquor. The X-ray data were collected at 100 K temperature on a Bruker AXS SMART APEX II CCD Duo diffractometer using MoK $\alpha$  radiation ( $\lambda = 0.71073 \text{ \AA}$ ),  $\omega$ -scans ( $2\theta = 56.56^\circ$ ), for a total number of 27803 independent reflections. Space group  $P2(1), 2(1), 2(1)$ ;  $a = 17.910(3)$ ,  $b = 24.339(4)$ ,  $c = 26.446(4) \text{ \AA}$ ,  $\alpha = 90.00$ ,  $\beta = 90.00$ ,  $\gamma = 90.00$ ,  $V = 11528(3) \text{ \AA}^3$ , Orthorhombic  $P$ ,  $Z = 4$  for chemical formula  $2(\text{C}_{54}\text{H}_{78}\text{N}_6\text{O}_9)\cdot\text{H}_2\text{O}$ , with two molecule in asymmetric unit;  $\rho_{\text{calcd}} = 1.111 \text{ g cm}^{-3}$ ,  $\mu = 0.076 \text{ mm}^{-1}$ ,  $F(000) = 4168$ ,  $R_{\text{int}} = 0.0661$ . The structure was obtained by direct methods using SHELXS-97.<sup>1</sup> All non-hydrogen atoms were refined anisotropically. The hydrogen atoms were fixed geometrically in the idealized position and refined in the final cycle of refinement as riding over the atoms to which they are bonded. The final  $R$  value was 0.0929 ( $wR2 = 0.2465$ ) for 11730 observed reflections ( $F_o \geq 4\sigma(|F_o|)$ ) and 1257 variables,  $S = 1.080$ . The largest difference peak and hole were 0.713 and  $-0.363 \text{ e \AA}^{-3}$ , respectively.

There were some partially occupied solvent molecules also present in the asymmetric unit. A significant amount of time was invested in identifying and refining the disordered molecules. Bond length restraints were applied to model the molecules but the resulting isotropic displacement coefficients suggested the molecules were highly mobile. Option SQUEEZE of program PLATON<sup>2</sup> was used to correct the diffraction data for diffuse scattering effects and to identify the solvent molecule. PLATON calculated the upper limit of volume that can be occupied by the solvent to be  $1151.4 \text{ \AA}^3$ , or 10% of the unit cell volume. The program calculated 208 electrons in the unit cell for the diffuse species. No data are given for the diffusely scattering species. Output of SQUEEZE reports are included in cif file P3.

### **Synthesis of (S, E)-ethyl 4-(tert-butoxycarbonylamino)-5-phenylpent-2-enoate [Boc-(S, E)-dgF-OEt]**

Boc-(S)-Phenylalanyl [(S)-tert-butyl 1-oxo-3-phenylpropan-2-ylcarbamate]<sup>3</sup> (5 g, 20 mmol) was dissolved in 60 mL of dry THF. Then ylide ( $\text{PPh}_3=\text{CHCO}_2\text{Et}$ ) (30 mmol, 10.45 g) was added to this solution at RT. Reaction mixture was stirred for about 5 hrs at RT. Completion of the reaction was monitored by TLC. After completion, the reaction mixture was quenched with 2(N) ammonium chloride solution in water (100 mL). Then the product was extracted with EtOAc (3 × 100 mL). Combined organic layer was washed with brine (100 mL) and dried over anhydrous  $\text{Na}_2\text{SO}_4$ . Organic layer was concentrated under reduced pressure to give the crude product, which was further purified on silica gel column chromatography using EtOAc/Pet-ether (60-80 °C) to get pure ethyl ester of *N*-Boc- (S, E)-  $\alpha$ ,  $\beta$ -unsaturated  $\gamma$ -phenylalanine.

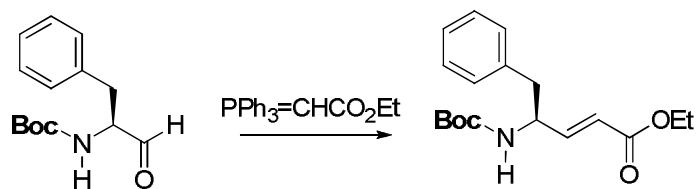

**(S, E)-ethyl 4-(tert-butoxycarbonylamino)-5-phenylpent-2-enoate (Boc-dgF-OEt)** : White powder (8.04 g, 84%);  $^1\text{H NMR}$  (400 MHz,  $\text{CDCl}_3$ )  $\delta$  7.3006-7.1423(m, 5H, -Ph), 6.9188-6.8670(dd,  $J = 5.04$ ,  $J = 11$ , 1H,  $\text{CH}=\text{CHCO}_2\text{Et}$ ), 5.8586-5.8195 (d,  $J = 17.4$ , 1H,  $\text{CH}=\text{CHCO}_2\text{Et}$ ), 4.5956 (b, 1H, NH), 4.5244 (b, 1H,  $\text{CH}-\text{CH}=\text{CH}$ ), 4.1893-4.1358 (q,  $J = 6.88$ , 2H,  $-\text{OCH}_2$ ), 2.922-2.8555 (m, 2H,  $\text{CH}_2$ -Ph), 1.3763 (s, 9H,  $-(\text{CH}_3)_3$  Boc), 1.2739-1.2381 (t,  $J = 7.3$ , 3H,  $-\text{OCH}_2\text{CH}_3$ );  $^{13}\text{C NMR}$  (100MHz,  $\text{CDCl}_3$ )  $\delta$  166.1454, 154.9128, 147.5676, 136.3376, 129.3685, 128.5495, 126.8338, 121.0495, 79.8302, 60.4434, 52.1647, 40.8203, 28.2629, 14.1884; **MALDI TOF/TOF**  $m/z$  Calcd. For  $\text{C}_{18}\text{H}_{25}\text{NO}_4$   $[\text{M}+\text{Na}]^+$  342.1681, observed 342.1657.

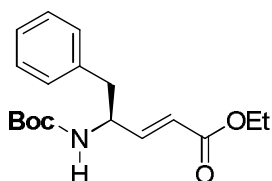

### Synthesis of Dipeptide

**Boc-Aib-dgF-OEt:** (S, E)-ethyl 4-(tert-butoxycarbonylamino)-5-phenylpent-2-enoate (Boc-dgF-OEt) (11 mmol, 3.15 g) was dissolved in DCM (10 mL) and cooled the solution in ice bath. Then, 10 mL of neat TFA was added slowly to this solution. After completion of the reaction (~ 30 min), TFA was removed from the reaction mixture under *vacuum*. The residue was dissolved in water and the pH was adjusted to ~10 by the slow addition of solid  $\text{Na}_2\text{CO}_3$  in ice cold conditions. Then Boc deprotected free amine was extracted with ethyl acetate (3  $\times$  40 mL). The combined organic layer was washed with brine (60 mL), dried over  $\text{Na}_2\text{SO}_4$ , concentrated under *vacuum* to *ca.* 2 mL and directly used for the coupling reaction in the next step.

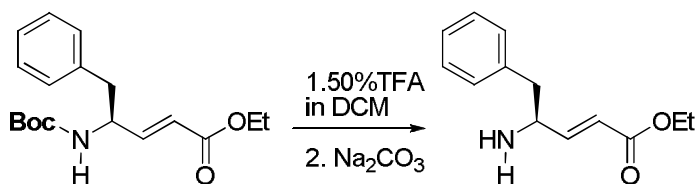

Boc-Aib-OH (10 mmol, 2 g) and  $\text{NH}_2$ -dgF-OEt were dissolved together in DMF (6 mL), followed by HBTU (11 mmol, 4.2 g) was added to the reaction mixture and cooled to  $0^\circ\text{C}$  for 5 min. Then, DiPEA (12 mmol, 2.15 mL) was added to the reaction mixture with stirring and the reaction mixture was allowed

to come to room temperature. The progress of the reaction was monitored by TLC. After completion (roughly 6 hrs), the reaction mixture was diluted with 400 mL of ethyl acetate and washed with 5% HCl (2 ×150 mL), 10 % sodium carbonate solution in water (2 ×150 mL) and followed by brine (130 mL). The organic layer was dried over anhydrous Na<sub>2</sub>SO<sub>4</sub> and evaporated under reduced pressure to give gummy yellowish product, which was purified on silica gel column chromatography using EtOAc/Pet-ether (60-80 °C) to get white crystalline product. Overall yield 75% (3.25 g, 7.5 mmol).

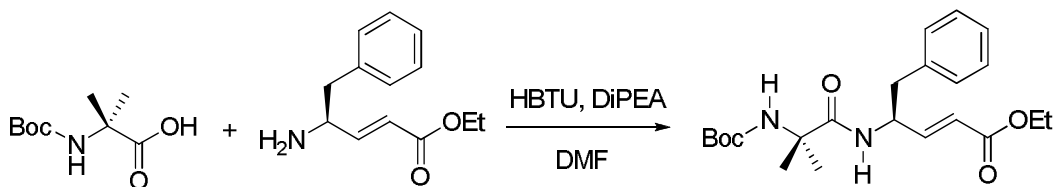

**Boc-Aib-dgF-OEt:** White crystalline powder (3.25 g, 75%); <sup>1</sup>H NMR (400 MHz, CDCl<sub>3</sub>) δ 7.31-7.17(m, 5H, -Ph), 6.96-6.91(dd, *J* = 5.04, *J* = 11.3, 1H, CH=CHCO<sub>2</sub>Et), 6.69 (b, 1H, NH), 5.94-5.90 (d, *J* = 16.8, 1H, CH=CHCO<sub>2</sub>Et), 4.98-4.91 (m, 1H, CH-CH=CH), 4.81 (s, 1H, NH), 4.19-4.13 (q, *J* = 6.88, 2H, -OCH<sub>2</sub>), 2.99-2.84 (m, 2H, CH<sub>2</sub>-Ph), 1.44 (s, 15H, -(CH<sub>3</sub>)<sub>3</sub> Boc, -(CH<sub>3</sub>)<sub>2</sub> Aib), 1.27-1.24 (t, *J* = 7.3, 3H, -OCH<sub>2</sub>CH<sub>3</sub>); <sup>13</sup>C NMR (100MHz, CDCl<sub>3</sub>) δ 173.37, 166.30, 154.98, 147.18, 136.55, 129.37, 128.63, 126.94, 121.21, 80.95, 60.44, 56.93, 50.76, 40.64, 28.36, 25.22, 14.27; **MALDI TOF/TOF** m/z Calcd. For C<sub>22</sub>H<sub>32</sub>N<sub>2</sub>O<sub>5</sub> [M+Na]<sup>+</sup> 427.2209, observed 427.2511.

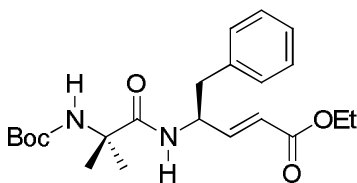

**Boc-Leu-dgF-OEt:** (*S*, *E*)-ethyl 4-(tert-butoxycarbonylamino)-5-phenylpent-2-enoate (Boc-dgF-OEt) (5.5 mmol, 1.57 g) was dissolved in DCM (5 mL) and the solution was cooled in ice bath. Then, 5 mL of neat TFA was added slowly to the solution. After completion of the reaction (30 min.), the TFA was removed from reaction mixture under reduced pressure. The residue was dissolved in water and the pH was adjusted to ~10 by the slow addition of solid Na<sub>2</sub>CO<sub>3</sub> in ice cold conditions. The Boc deprotected free amine was extracted with ethyl acetate (3 × 40 mL). The combined organic layer was washed with brine (60 mL), dried over anhydrous Na<sub>2</sub>SO<sub>4</sub> and concentrated under *vacuum* to *ca.* 2 mL and directly used for coupling reaction.

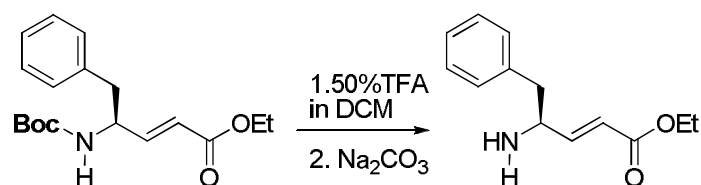

Boc-Leu-OH (5 mmol, 1.15 g) and NH<sub>2</sub>-dgF-OEt were dissolved together in DMF (4 mL) and HBTU (5.5 mmol, 2.1 g) was added into the reaction mixture. The reaction mixture was cooled to 0 °C for 5 min. Then DiPEA (6 mmol, 1.05 mL) was added to the reaction mixture and allowed to come to room temperature. The progress of the reaction was monitored by TLC. After completion of the reaction (roughly 6 hrs), the reaction mixture was diluted with 300 mL of ethyl acetate and washed with 5% HCl (2 × 100 mL), 10 % sodium carbonate solution in water (2 × 100 mL) followed by brine (100 mL). The organic layer was dried over anhydrous Na<sub>2</sub>SO<sub>4</sub> and evaporated under reduced pressure to get gummy yellowish product, which was purified via silica gel column chromatography using EtOAc/Pet-ether (60-80 °C) to get white solid product. Overall yield 78% (1.68 g, 3.9 mmol).

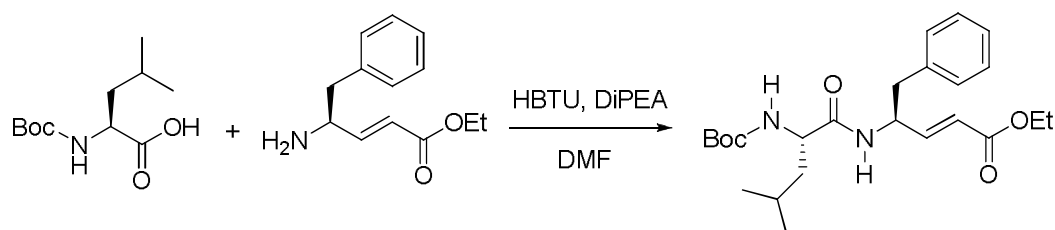

**Boc-Leu-dgF-OEt:** White powder (1.68 g, 78%); <sup>1</sup>H NMR (400 MHz, CDCl<sub>3</sub>) δ 7.31-7.16 (m, 5H, -Ph), 6.94-6.88 (dd, *J* = 4.9, *J* = 10.9, 1H, CH=CHCO<sub>2</sub>Et), 6.34-6.31 (d, *J* = 8.8, 1H, NH), 5.86-5.82 (d, *J* = 16.9, 1H, CH=CHCO<sub>2</sub>Et), 4.08-4.90 (m, 1H, α-H of Leu), 4.74-4.73 (d, *J* = 5.8, 1H, NH), 4.20-4.14 (q, *J* = 7.1, 2H, -OCH<sub>2</sub>), 4.08-3.99 (m, 1H, CH-CH=CH), 2.97-2.85 (m, 2H, CH<sub>2</sub>-Ph), 2.08-2.05 (m, 2H, β-H of Leu), 1.63-1.54 (m, 1H, γ-H of Leu), 1.44 (s, 9H, -(CH<sub>3</sub>)<sub>3</sub> Boc), 1.28-1.25 (t, *J* = 7.1, 3H, -OCH<sub>2</sub>CH<sub>3</sub>), 0.92-0.90 (d, *J* = 6.9, 3H); <sup>13</sup>C NMR (100MHz, CDCl<sub>3</sub>) δ 171.95, 166.05, 155.74, 146.57, 136.18, 129.29, 128.58, 126.94, 121.35, 80.42, 60.47, 50.62, 40.43, 31.57, 28.24, 24.69, 22.88, 14.17; **MALDI TOF/TOF** m/z Calcd. For C<sub>24</sub>H<sub>36</sub>N<sub>2</sub>O<sub>5</sub> [M+Na]<sup>+</sup> 455.2522, observed 455.3341

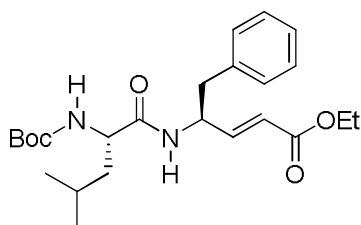

### Synthesis of Tetrapeptide Boc-Aib-dgF-Leu-dgF-OEt (P1)

**Boc-Aib-dgF-OH:** Boc-Aib-dgF-OEt (2 mmol, 0.810 g) was dissolved in ethanol (5 mL). Then 5 mL of 1(N) NaOH was added slowly to this solution. After completion of the reaction (~ 2 hrs), ethanol was evaporated from reaction mixture and the residue was acidified to pH ~ 3 using 5% HCl (5% volume in water) at cold conditions after diluting with 50 mL of cold water. Product was extracted with ethyl acetate (3 × 30 mL). Combined organic layer was washed with brine (40 mL) and dried over anhydrous Na<sub>2</sub>SO<sub>4</sub>. Organic layer was concentrated under reduced pressure to give gummy product with quantitative yield 98% (1.83 mmol, 0.742 g).

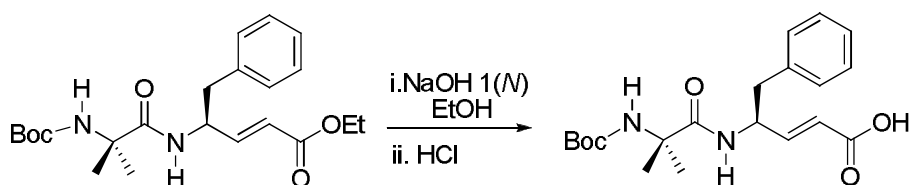

**NH<sub>2</sub>-Leu-dgF-OEt:** Boc-Leu-dgF-OEt (2.2 mmol, 0.870 g) was dissolved in DCM (5 mL) and cooled the solution in ice bath. Then 5 mL of neat TFA was added to the solution. After completion of the reaction (~ 30 min), TFA was removed from reaction mixture under *vacuum*. The residue was dissolved in water and the pH was adjusted to ~10 by the slow addition of solid Na<sub>2</sub>CO<sub>3</sub> in ice cold conditions. Then Boc deprotected dipeptide was extracted with ethyl acetate (3 × 40 mL). Combined organic layer was washed with brine (60 mL), dried over anhydrous Na<sub>2</sub>SO<sub>4</sub>, concentrated under *vacuum* to *ca.* 2 mL and directly used for coupling reaction in the next step.

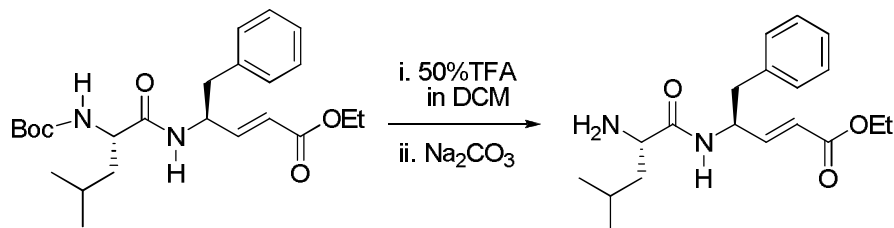

Boc-Aib-dgF-OH (1.83 mmol, 0.742 g) and NH<sub>2</sub>-Leu-dgF-OEt were dissolved together in DMF (5 mL) followed by HBTU (2.2 mmol, 0.820 g) was added. The reaction mixture was cooled to 0 °C for 5 min. Then DiPEA (2.5 mmol, 0.45 mL) was added to the reaction mixture and it was allowed to come to room temperature at constant stirring. The progress of the reaction was monitored by TLC. After completion of



the reaction (roughly 4hrs), the reaction mixture was diluted with 200 mL of ethyl acetate and washed with 5% HCl (2 × 80 mL), 10 % sodium carbonate solution in water (2 × 80 mL) and followed by brine (80 mL). The organic layer was dried over anhydrous Na<sub>2</sub>SO<sub>4</sub> and evaporated under reduced pressure to give gummy yellowish product, which was purified on silica gel column chromatography using DCM/MeOH solvent system to get gummy product, which was further crystallized using EtOAc/Hexane. Overall yield 68% (1.36 mmol, 0.938 g).

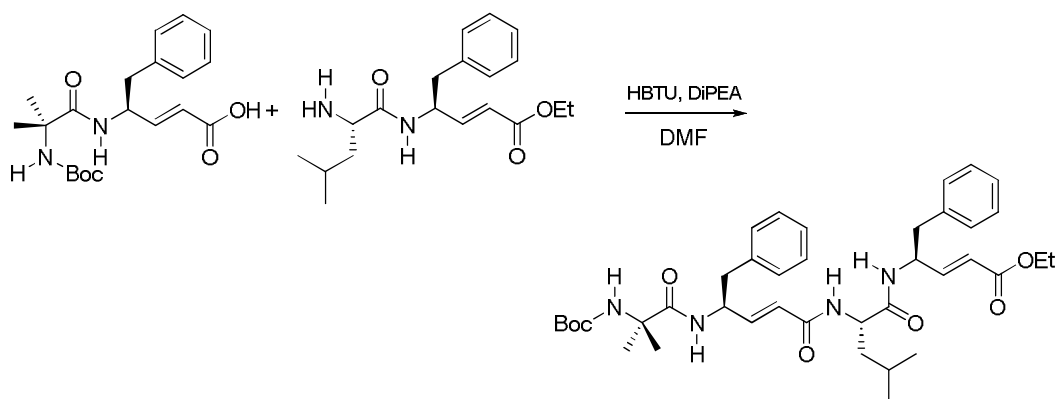

**Boc-Aib-dgF-Leu-dgF-OEt:** White crystalline powder (0.938 g, 68%); <sup>1</sup>H NMR (400 MHz, CDCl<sub>3</sub>) δ 7.31-7.10 (m, 10H, -Ph), 6.92-6.84 (m, 2H, CH=CH), 6.66-6.84 (d, *J* = 8.5, 1H, NH), 6.44-6.42 (d, *J* = 8.5, 1H, NH), 6.06-6.02 (d, *J* = 15.5, 1H, CH=CH), 5.88-5.83 (d, *J* = 17.4, 1H, CH=CH), 5.80-5.78 (d, *J* = 7.8, 1H, NH), 5.00-4.95 (m, 2H), 4.91-4.84 (m, 1H, -CH-), 4.81 (s, 1H, NH), 4.46-4.40 (m, 1H, -CH-), 4.20-4.15 (q, *J* = 7, 2H, -OCH<sub>2</sub>), 3.03-2.77 (m, 4H, CH<sub>2</sub>-Ph), 1.71-1.52 (m, 3H, α and β-H of Leu), 1.47 (s, 3H, -(CH<sub>3</sub>)<sub>2</sub> Aib), 1.39 (s, 9H, -(CH<sub>3</sub>)<sub>3</sub> Boc), 1.29-1.26 (t, *J* = 7.1, 3H, -OCH<sub>2</sub>CH<sub>3</sub>), 1.27 (s, 3H, -(CH<sub>3</sub>)<sub>2</sub> Aib), 0.90-0.88 (d, *J* = 6.8, 3H, -CH<sub>3</sub> of Leu), 0.87-0.86 (d, *J* = 6.8, 3H, -CH<sub>3</sub> of Leu); **MALDI TOF/TOF** *m/z* Calcd. For C<sub>39</sub>H<sub>54</sub>N<sub>4</sub>O<sub>7</sub> [M+Na]<sup>+</sup> 713.3890, observed 713.4538.

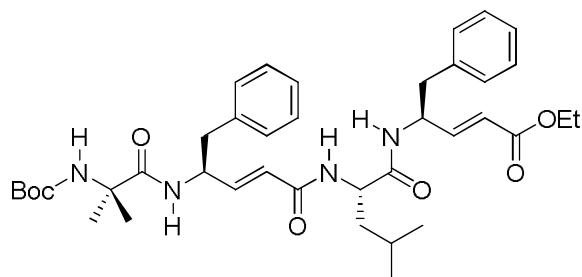

**Transformation of α/Vinylogous hybrid peptide (Boc-Aib-dgPhe-Leu-dgPhe-OEt) to saturated α/γ<sup>4</sup>-hybrid peptide (Boc-Aib-γ<sup>4</sup>Phe-Leu-γ<sup>4</sup>Phe-OEt) (P1) <sup>4</sup>**

Vinylogous hybrid tetra peptide (0.5 mmol) was dissolved in EtOH (5 mL), and was treated with 60 mg of 20% Pd/C. The hydrogen gas was supplied through balloon. The schematic representation is shown below. The reaction mixture was stirred under hydrogen atmosphere for about 6 hrs. The completion of the reaction was monitored by MALDI-TOF/TOF and HPLC. After the completion of reaction, the reaction mixture was diluted with EtOH (30 mL) and it was filtered through sintered funnel using celite bed and celite bed was washed with EtOH (3 × 25mL). The filtrate was evaporated under *vacuum* to get white crystalline pure product. Overall, the  $\alpha/\gamma^4$ -hybrid peptide was isolated with quantitative yield.

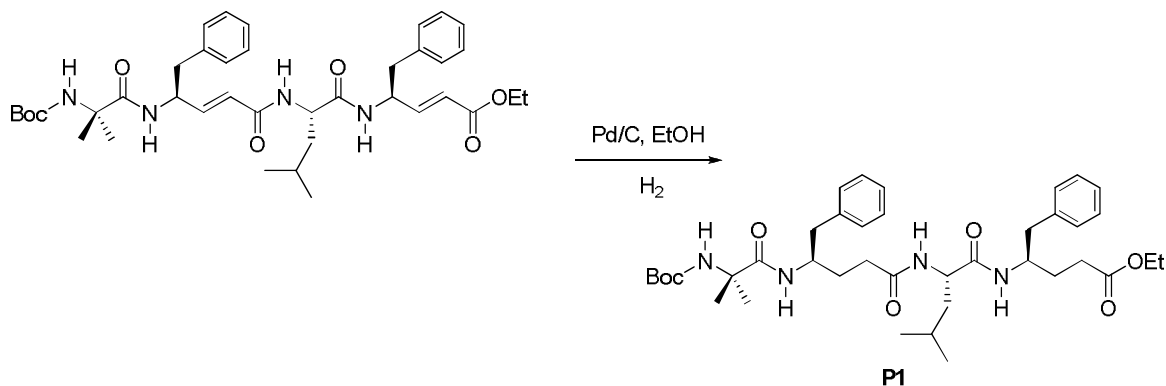

**Boc-Aib- $\gamma^4$ Phe-Leu- $\gamma^4$ Phe-OEt:(P1):** White crystalline powder (332 mg, 96%);  $^1\text{H NMR}$  (400 MHz,  $\text{CDCl}_3$ )  $\delta$  7.49-7.47 (d,  $J = 8.7$ , 1H, NH), 7.29-7.13 (m, 10H, -Ph), 6.76 (s, 1H, NH), 5.85-5.83 (d,  $J = 9.28$ , 1H, NH), 4.93 (s, 1H, NH), 4.30-4.18 (m, 2H, -CH-), 4.12-4.07 (m, 3H, -OCH<sub>2</sub>-, -CH-), 3.00-2.80 (m, 4H, CH<sub>2</sub>-Ph), 2.65-2.60 (m, 1H, CH<sub>2</sub>-Ph), 2.57-2.36 (m, 2H, -CH<sub>2</sub>-), 2.30-2.10 (m, 3H, -CH<sub>2</sub>-), 1.97-1.72 (m, 14H, -CH<sub>2</sub>-), 1.60-1.53 (m, 1H,  $\gamma$ -H of Leu), 1.48 (s, 3H, -(CH<sub>3</sub>)<sub>2</sub> Aib), 1.41 (s, 9H, -(CH<sub>3</sub>)<sub>3</sub> Boc), 1.26-1.22 (t,  $J = 7$ , 3H, -OCH<sub>2</sub>CH<sub>3</sub>), 1.22 (s, 3H, -(CH<sub>3</sub>)<sub>2</sub> Aib), 0.84-0.82 (d,  $J = 6.6$ , 3H, -CH<sub>3</sub> of Leu), 0.80-0.79 (d,  $J = 6.9$ , 3H, -CH<sub>3</sub> of Leu); **MALDI TOF/TOF**  $m/z$  Calcd. For C<sub>39</sub>H<sub>58</sub>N<sub>4</sub>O<sub>7</sub> [M+Na]<sup>+</sup> 717.4203, observed 717.5516.

#### Synthesis of Hexapeptide (Boc-Aib- $\gamma^4$ Phe-Leu- $\gamma^4$ Phe-Aib-dgF-OEt) (P2)

**Boc-Aib- $\gamma^4$ Phe-Leu- $\gamma^4$ Phe-OH:** Boc-Aib- $\gamma^4$ Phe-Leu- $\gamma^4$ Phe-OEt (0.4 mmol, 0.286 g) was dissolved in ethanol (4 mL). Then 5 mL of 1(N) NaOH was added slowly to this solution. After completion of the reaction (~ 2 hrs), ethanol was evaporated from reaction mixture and residue was acidified to  $p\text{H} \sim 3$  using 5% HCl (5% volume in water) at cold conditions after diluting with 50 mL cold water. Product was extracted with ethyl acetate (3 × 25 mL). Combined organic layer was washed with brine (40 mL) and dried over anhydrous Na<sub>2</sub>SO<sub>4</sub>. Organic layer was concentrated under reduced pressure to give gummy product with quantitative yield 98% (0.392 mmol, 0.261 g).

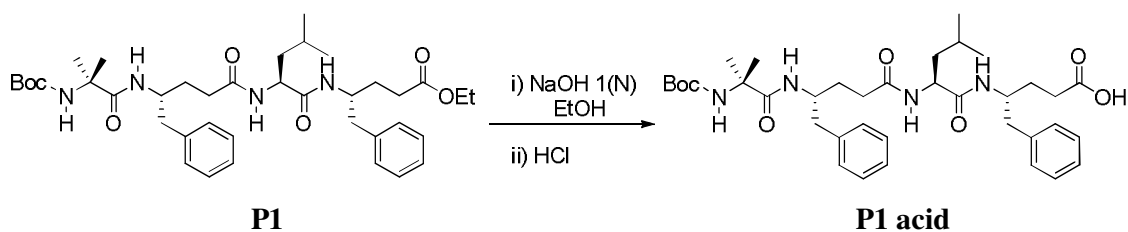

**NH<sub>2</sub>-Aib-dgF-OEt:** Boc-Aib-dgF-OEt (0.5 mmol, 0.210 g) was dissolved in DCM (3 mL) and cooled the solution in ice bath. Then 3 mL of neat TFA was added to the solution. After completion of the reaction (~ 30 min), TFA was removed from reaction mixture under vacuum. The residue was dissolved in water and the pH was adjusted to ~10 by the slow addition of solid Na<sub>2</sub>CO<sub>3</sub> at ice cold conditions. Then Boc deprotected dipeptide was extracted with ethyl acetate (3 × 25 mL). Combined organic layer was washed with brine (40 mL), dried over Na<sub>2</sub>SO<sub>4</sub> and concentrated under *vacuum* to *ca.* 2 mL and directly used for the coupling reaction in the next step.

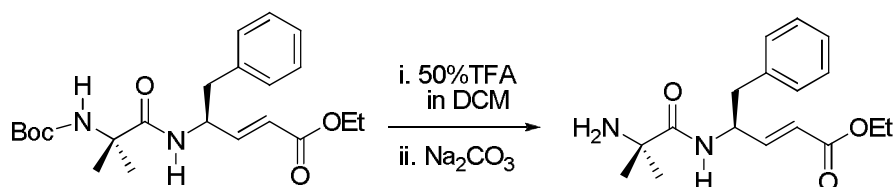

Boc-Aib- $\gamma^4$ Phe-Leu- $\gamma^4$ Phe-OH (0.392 mmol, 0.261 g) and NH<sub>2</sub>-Aib-dgF-OEt were dissolved together in DMF (2 mL) followed by HBTU (0.5 mmol, 0.190 g) was added. The reaction mixture was cooled to 0 °C for 5 min. Then DiPEA (0.7 mmol, 0.12 mL) was added to the reaction mixture and it was allowed to come to room temperature at constant stirring. The progress of the reaction was monitored by TLC. After completion of the reaction (roughly 8 hrs), the reaction mixture was diluted with 100 mL of ethyl acetate. The organic layer was washed with 5% HCl (2 × 40 mL), 10 % sodium carbonate solution in water (2 × 40 mL) and brine (50 mL). The organic layer was dried over Na<sub>2</sub>SO<sub>4</sub> and evaporated under reduced pressure to give gummy yellowish product, which was purified on silica gel column chromatography using EtOAc/Pet-ether (product was eluted at 90% EtOAc in pet-ether) solvent system to get gummy product, which was further crystallized using EtOAc/Hexane. Overall yield 60% (0.231 mmol, 0.220 g).

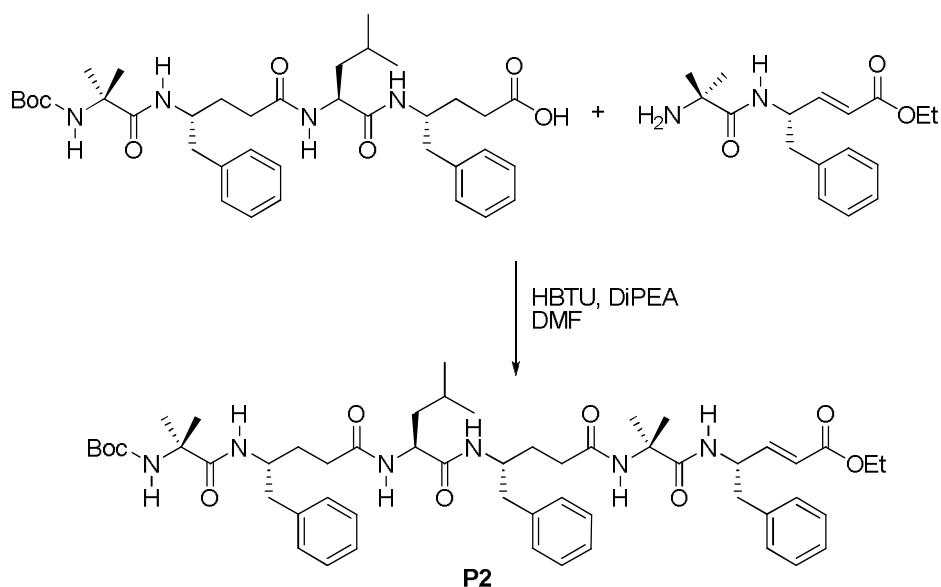

**Boc-Aib- $\gamma^A$ Phe-Leu- $\gamma^A$ Phe-Aib-dgF-OEt (P2):** White crystalline powder (0.22 g, 60%);  $^1\text{H NMR}$  (500 MHz,  $\text{CDCl}_3$ )  $\delta$  8.59-8.57 (d,  $J = 8.3$ , 1H, NH), 7.70-7.68 (d,  $J = 10.2$ , 1H, NH), 7.48-7.47 (d,  $J = 3.85$ , 1H, NH), 7.48-7.07 (m, 17H, -Ph, NH, -CH-( $\beta$ ) of dgF), 6.53-6.49 (dd,  $J = 17.7$ ,  $J = 2.1$ , 1H, -CH= -CH  $\alpha$  of dgF), 6.07-6.05 (d,  $J = 10.3$ , 1H, NH), 5.23 (s, 1H, NH), 5.13-4.97 (m, 1H,  $\gamma$ -CH- of dgF), 4.26-4.13 (m, 4H  $\gamma$ -CH- of  $\gamma$ Phe, -OCH<sub>2</sub>), 3.80-3.76 (m, 1H,  $\alpha$ -CH- of Leu), 2.98-2.60 (m, 6H, -CH<sub>2</sub>-Ph), 2.29-2.10 (m, 4H,  $\alpha$ -CH<sub>2</sub>- of  $\gamma$ Phe), 1.76 (s, 3H, -(CH<sub>3</sub>)<sub>2</sub> for Aib), 1.71-1.65 (m, 2H,  $\beta$ -CH<sub>2</sub>- of  $\gamma$ Phe), 1.59 (s, 3H, -(CH<sub>3</sub>)<sub>2</sub> for Aib), 1.55-1.48 (m, 2H,  $\beta$ -CH<sub>2</sub>- of  $\gamma$ Phe), 1.45 (s, 3H, -(CH<sub>3</sub>)<sub>2</sub> for Aib), 1.43 (s, 9H, -(CH<sub>3</sub>)<sub>3</sub> Boc), 1.30 (s, 3H, -(CH<sub>3</sub>)<sub>2</sub> for Aib), 1.29-1.26 (t,  $J = 7$ , 3H, -OCH<sub>2</sub>CH<sub>3</sub>), 1.20-1.14 (m, 2H,  $\beta$ -CH<sub>2</sub>- of Leu), 0.99 (s, 3H, -(CH<sub>3</sub>)<sub>2</sub> for Aib), 0.94-0.88 (m, 2H,  $\gamma$ -CH<sub>2</sub>- of Leu), 0.83-0.82 (d,  $J = 6.6$ , 3H, -CH<sub>3</sub> of Leu), 0.78-0.77 (d,  $J = 6.7$ , 3H, -CH<sub>3</sub> of Leu); **MALDI TOF/TOF**  $m/z$  Calcd. For C<sub>54</sub>H<sub>76</sub>N<sub>6</sub>O<sub>9</sub> [M+Na]<sup>+</sup> 975.5571, observed 975.9615

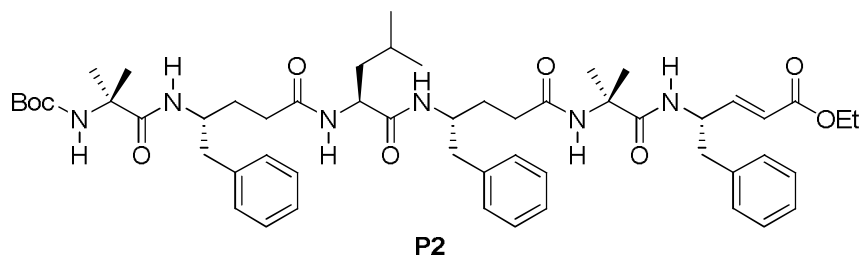

**Transformation of Alpha-Gamma-Vinylogous hybrid hexapeptide Boc-Aib- $\gamma^4$ Phe-Leu- $\gamma^4$ Phe-Aib-dgF-OEt (P2) to its saturated hybrid  $\gamma^4$ -peptide analogue Boc-Aib- $\gamma^4$ Phe-Leu- $\gamma^4$ Phe-Aib- $\gamma^4$ Phe-OEt (P3)**

Boc-Aib- $\gamma^4$ Phe-Leu- $\gamma^4$ Phe-Aib-dgF-OEt (P2) (0.10 mmol, 100 mg) was dissolved in EtOH (4 mL), and was treated with 20 mg of 20% Pd/C. The hydrogen gas was supplied through balloon. The schematic representation is shown below. The reaction mixture was stirred under hydrogen atmosphere for about 6 hrs. The completion of the reaction was monitored by MALDI-TOF/TOF ( $m/z$  Calcd. For  $C_{54}H_{78}N_6O_9$   $[M+Na]^+$  977.5728, observed 977.8813) and HPLC. After the completion of the reaction, the reaction mixture was diluted with EtOH (10 mL) and it was filtered through sintered funnel using celite bed and celite bed was washed with EtOH ( $3 \times 15$  mL). The filtrate was evaporated under *vacuum* to get white crystalline pure product. Overall, the  $\alpha/\gamma^4$ -hybrid peptide was isolated in 97% yield (97 mg, 0.097 mmol).

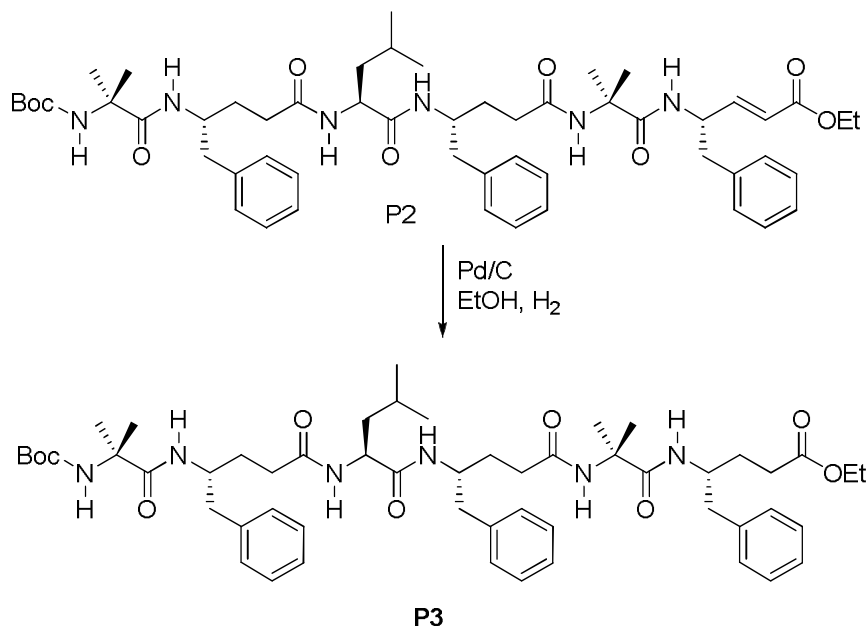

**Boc-Aib- $\gamma^4$ Phe-Leu- $\gamma^4$ Phe-Aib- $\gamma^4$ Phe-OEt (P3):** White crystalline powder (0.097 g, 97%); <sup>1</sup>H NMR (500 MHz, CDCl<sub>3</sub>)  $\delta$  8.08-8.06 (d,  $J = 9.25$ , 1H, NH), 7.66-7.64 (d,  $J = 10.2$ , 1H, NH), 7.39-7.38 (d,  $J = 4$ , 1H, NH), 7.39-7.09 (m, 15H, -Ph), 7.01 (s, 1H, NH), 5.96-5.94 (d,  $J = 10.3$ , 1H, NH), 5.05 (s, 1H, NH), 4.26-4.13 (m, 5H, -OCH<sub>2</sub>, -CH-( $\gamma$ ) of  $\gamma^4$ Phe), 3.85-3.82 (m, 1H,  $\alpha$ -CH- of Leu), 2.99-2.59 (m, 6H, CH<sub>2</sub>-Ph), 2.49-2.02 (m, 6H, -CH<sub>2</sub>-( $\alpha$ ) of  $\gamma^4$ Phe), 1.99-1.83(m, 6H, -CH<sub>2</sub>-( $\beta$ ) of  $\gamma^4$ Phe), 1.72-1.58(m, 6H, -CH<sub>2</sub>-

( $\beta$ ) of  $\gamma$ Phe), 1.56-1.48(m, 6H,  $-\text{CH}_2-$ ( $\beta$ ) of  $\gamma$ Phe), 1.60 (s, 3H,  $-(\text{CH}_3)_2$  for Aib), 1.44 (s, 9H,  $-(\text{CH}_3)_3$  Boc), 1.43 (s, 3H,  $-(\text{CH}_3)_2$  for Aib), 1.29 (s, 3H,  $-(\text{CH}_3)_2$  for Aib), 1.27-1.22 (m, 5H,  $-\text{OCH}_2\text{CH}_3$ ,  $\text{CH}_2-$ ,  $\beta$ -H of Leu), 1.13-1.05 (m, 1H,  $\gamma$ -H of Leu), 1.00 (s, 3H,  $-(\text{CH}_3)_2$  for Aib), 0.86-0.85 (d,  $J = 6.6$ , 3H,  $-\text{CH}_3$  of Leu), 0.81-0.80 (d,  $J = 6.7$ , 3H,  $-\text{CH}_3$  of Leu); **MALDI TOF/TOF** m/z Calcd. For  $\text{C}_{54}\text{H}_{78}\text{N}_6\text{O}_9$   $[\text{M}+\text{Na}]^+$  977.5728, observed 977.8813

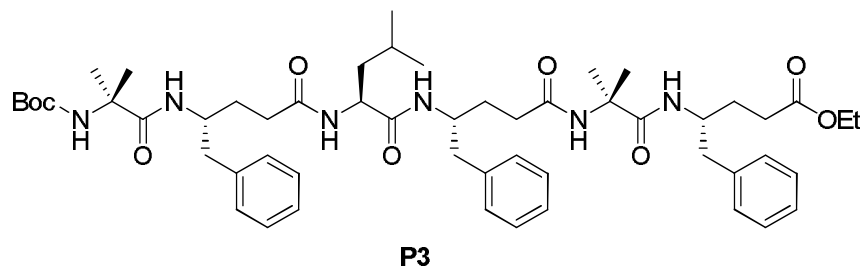

## Reference

1. a) SHELXS-97: G. M. Sheldrick, *Acta Crystallogr. Sect A*, **1990**, *46*, 467. b) G. M. Sheldrick, SHELXL-97, Universität Göttingen (Germany) **1997**.
2. A. L. Spek (1990) *Acta Cryst.* A46, C34.
3. S. M. Mali, A. Bandyopadhyay, S. V. Jadhav, M. G. Kumar, H. N. Gopi, *Org. Biomol. Chem.* **2011**, *9*, 6566.
4. A. Bandyopadhyay, S. M. Mali, P. Lunawat, K. M. P. Raja, H. N. Gopi, *Org. Lett.* **2011**, *13*, 4482.

### $^1\text{H}$ , $^{13}\text{C}$ and MALDI-TOF Mass Data

$^1\text{H}$  NMR spectrum of **Boc-dgF-OEt** acquired in a 400 MHz spectrometer ( $\text{CDCl}_3$ )

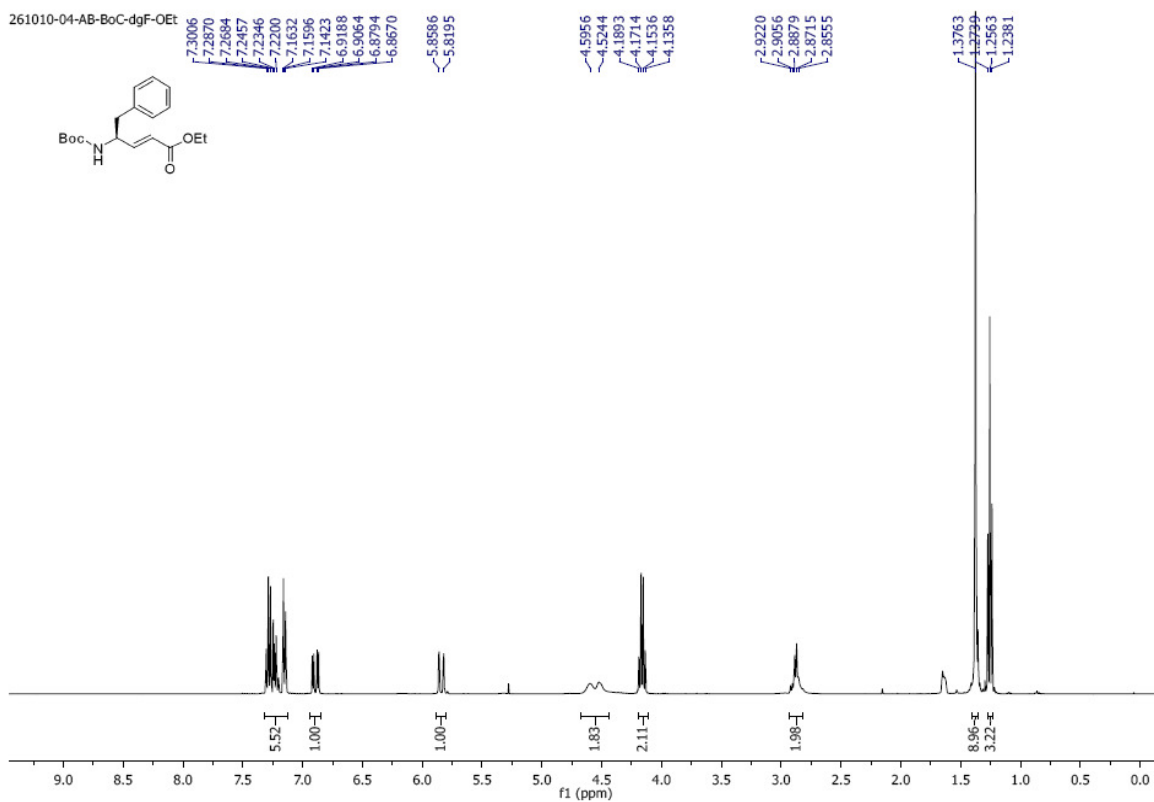

$^{13}\text{C}$  NMR spectrum of **Boc-dgF-OEt** acquired in a 100 MHz spectrometer

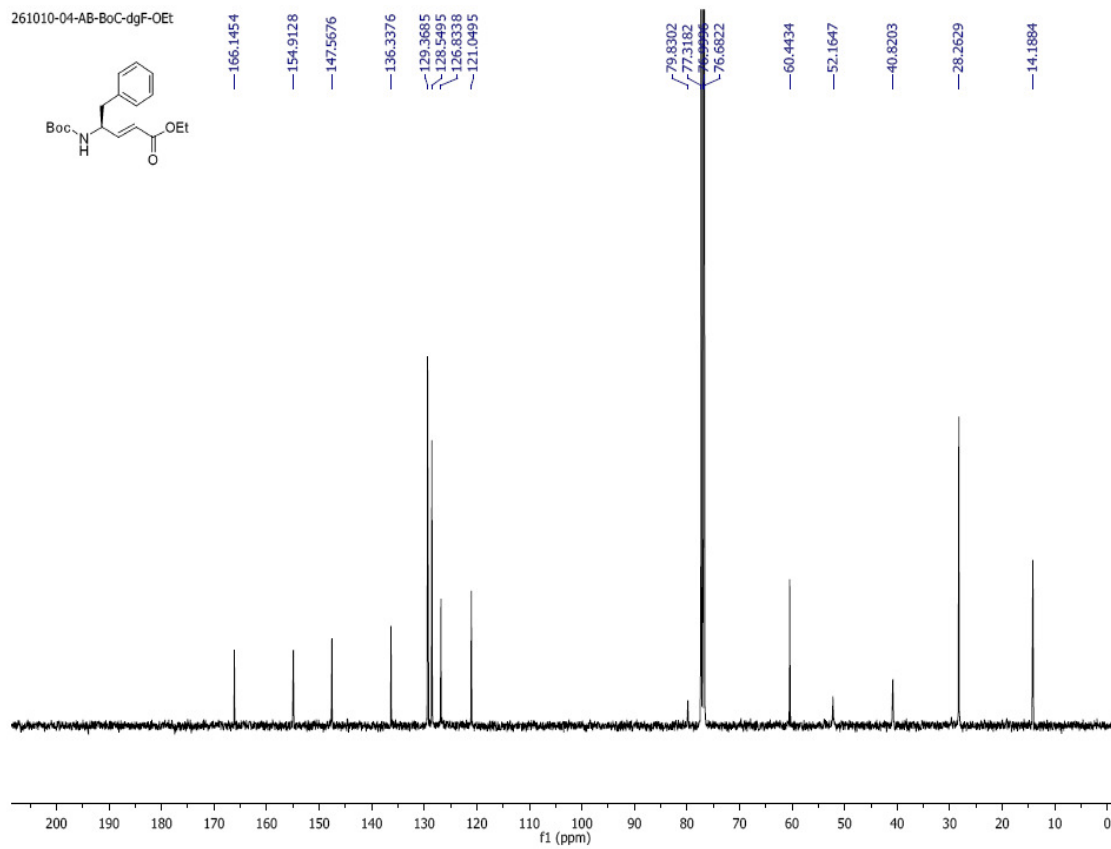



### Mass spectrum of **Boc-dgF-OEt** acquired in a MALDI TOF/TOF spectrometer

#### Spectrum Report

Final - Shots 25 - HNG GROUP; Label H17

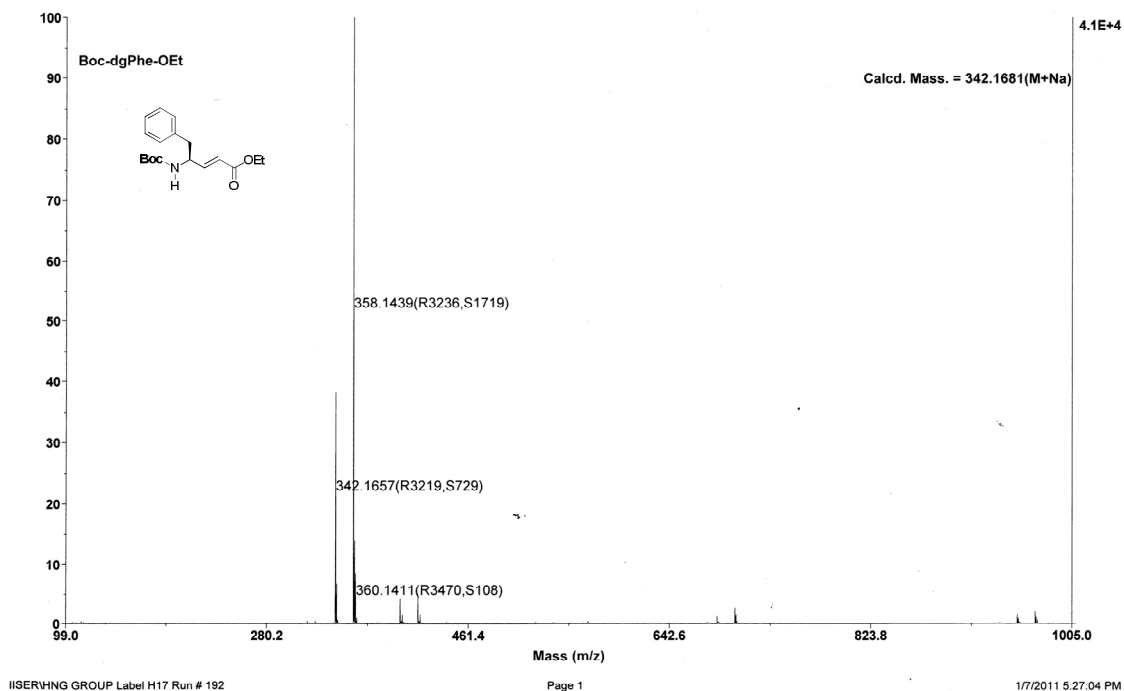



$^{13}\text{C}$  NMR spectrum of **Boc-Aib-dgF-OEt** acquired in a 100 MHz spectrometer

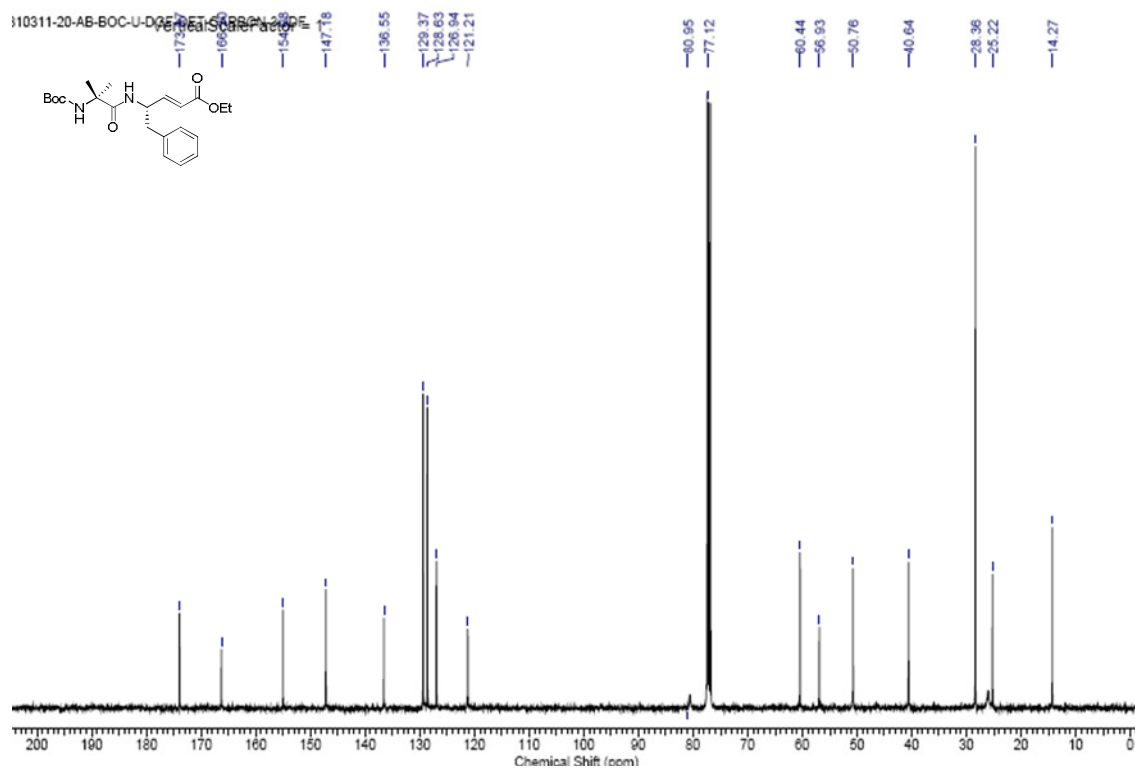

Mass spectrum of **Boc-Aib-dgF-OEt** acquired in a MALDI TOF/TOF spectrometer

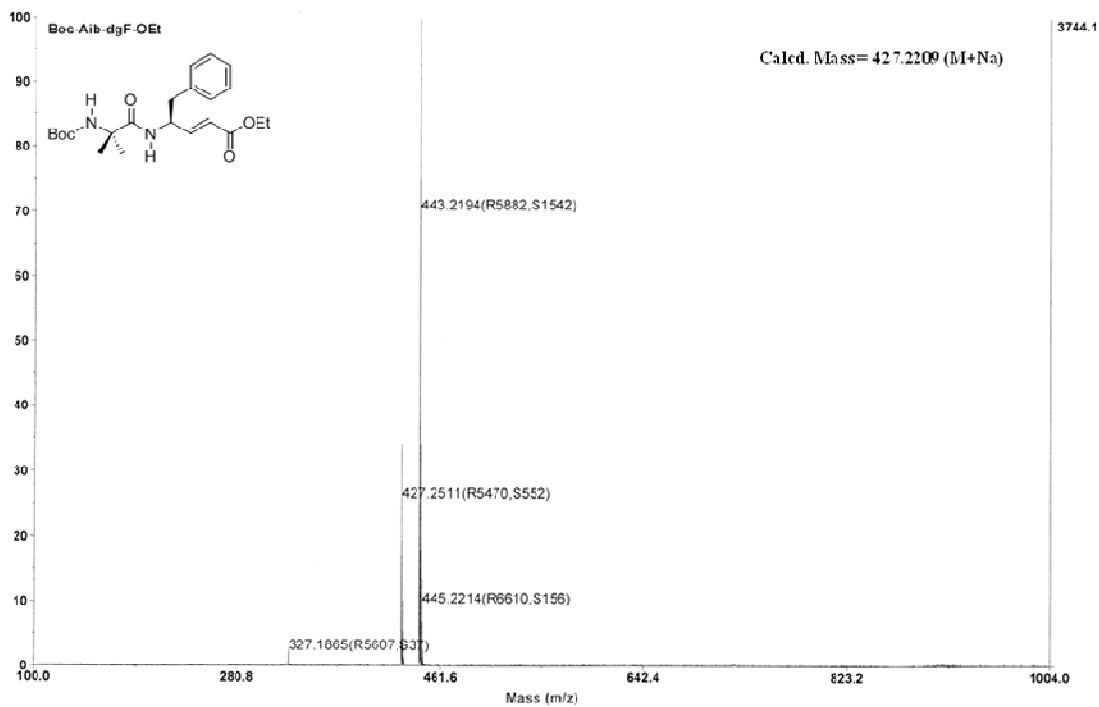

$^1\text{H}$  NMR spectrum of **Boc-Leu-dgF-OEt** acquired in a 400 MHz spectrometer ( $\text{CDCl}_3$ )

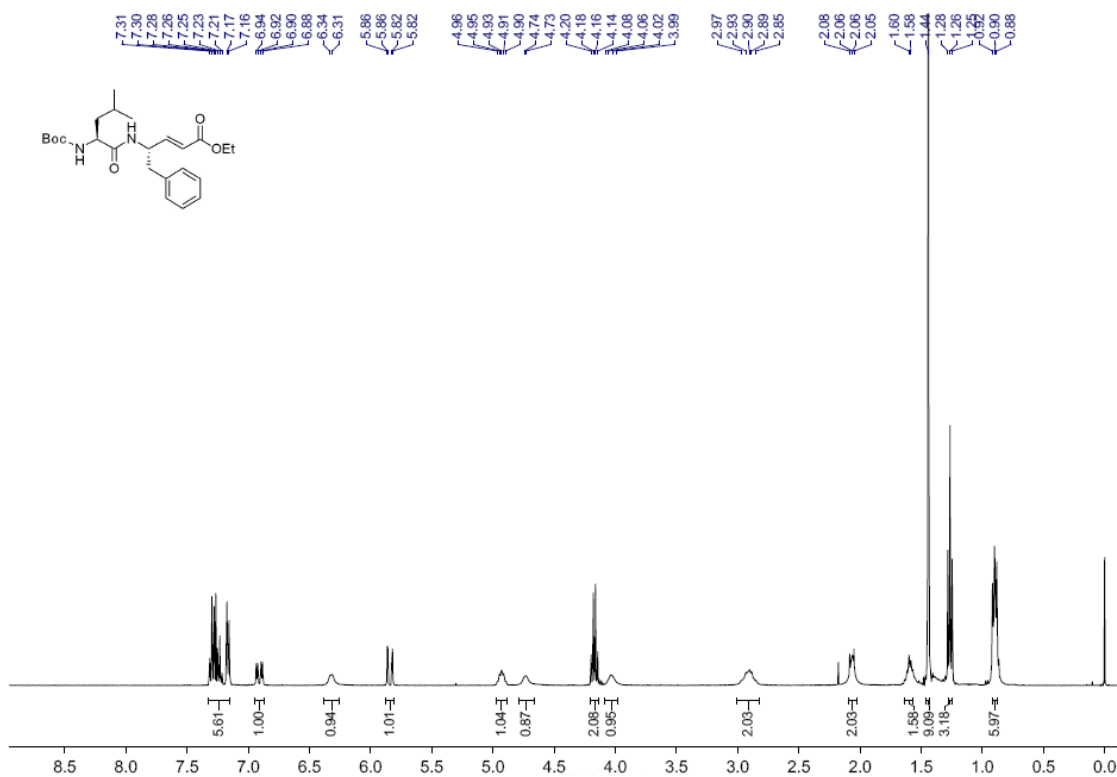

$^{13}\text{C}$  NMR spectrum of **Boc-Leu-dgF-OEt** acquired in a 100 MHz spectrometer

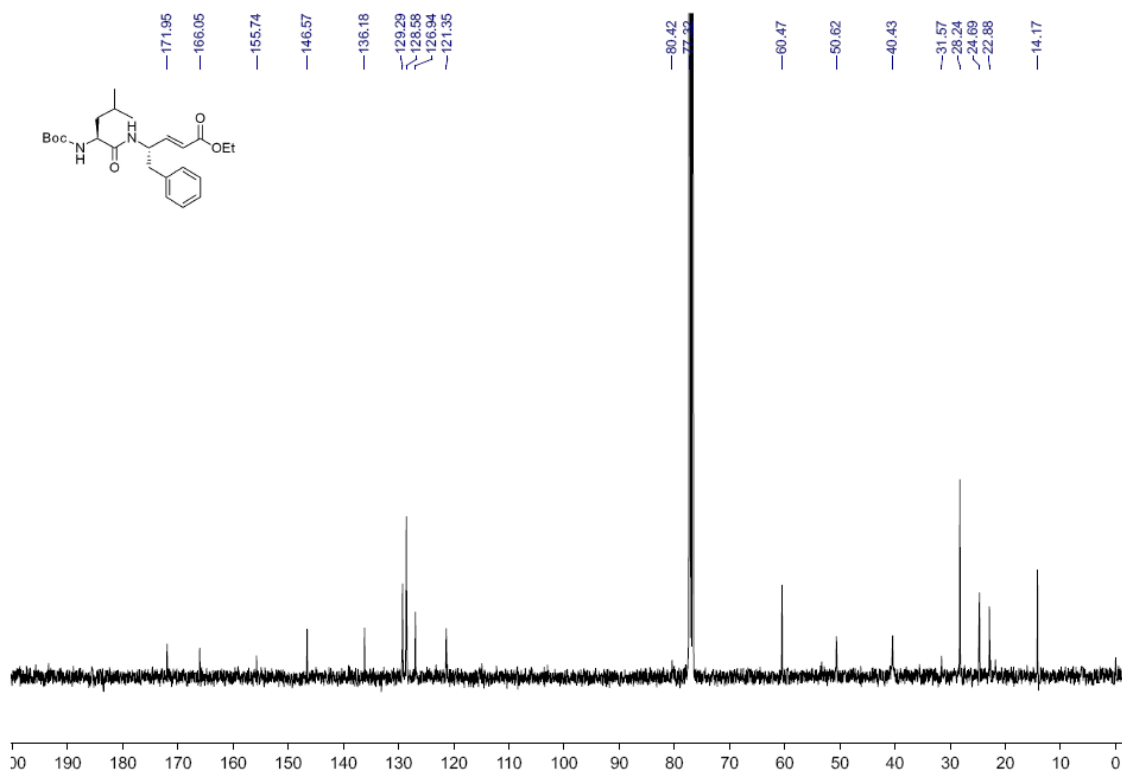

Mass spectrum of **Boc-Leu-dgF-OEt** acquired in a MALDI TOF/TOF spectrometer

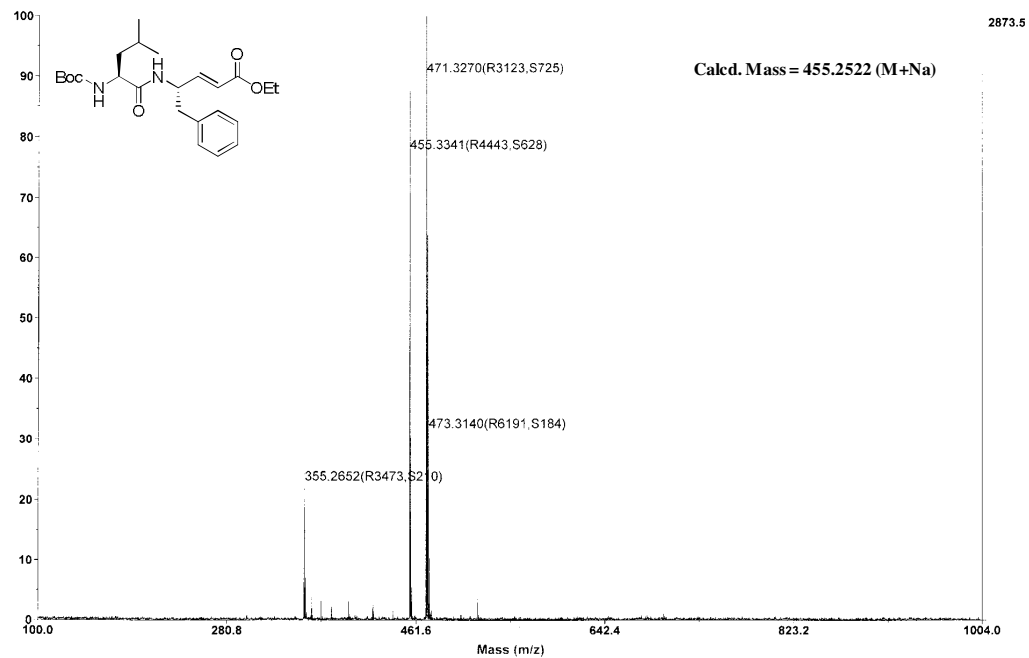

$^1\text{H}$  NMR spectrum of **Boc-Aib-dgF-Leu-dgF-OEt** acquired in a 400 MHz spectrometer ( $\text{CDCl}_3$ )

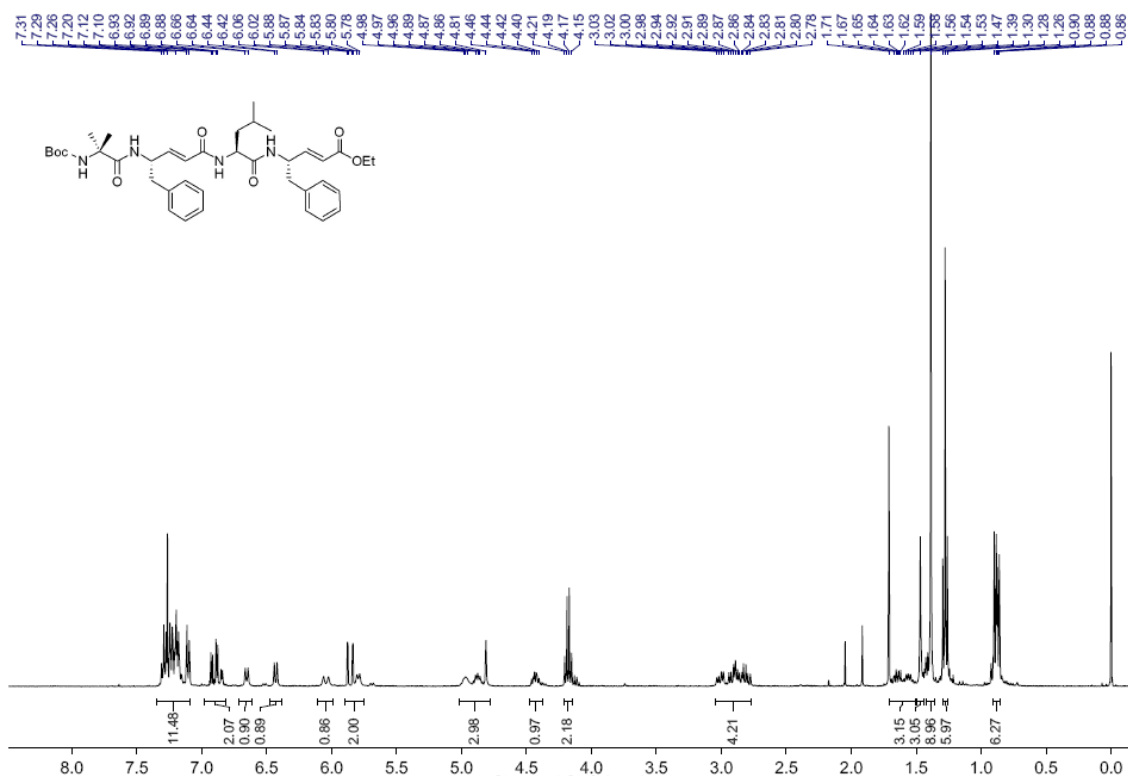





$^1\text{H}$  NMR spectrum of **Boc-Aib- $\gamma^4$ Phe-Leu- $\gamma^4$ Phe-OEt (P1)** acquired in a 400 MHz spectrometer ( $\text{CDCl}_3$ )

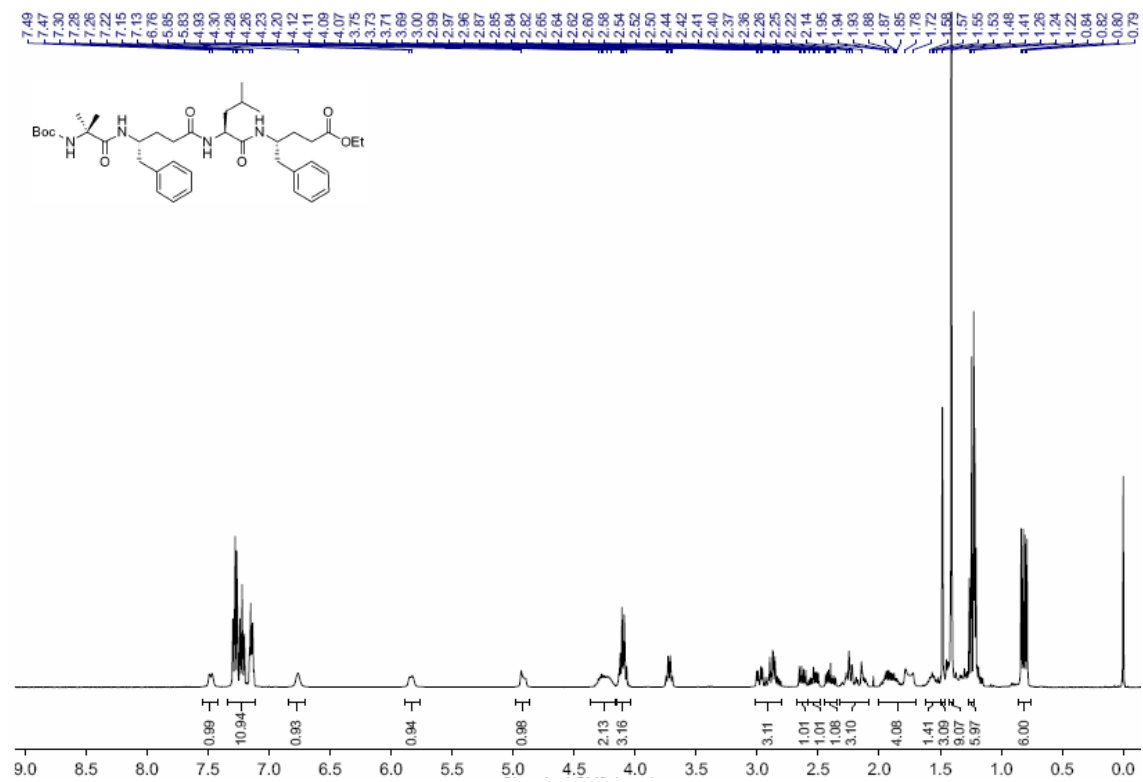

Mass spectrum of **Boc-Aib- $\gamma^4$ Phe-Leu- $\gamma^4$ Phe-OEt (P1)** acquired in a MALDI TOF/TOF spectrometer

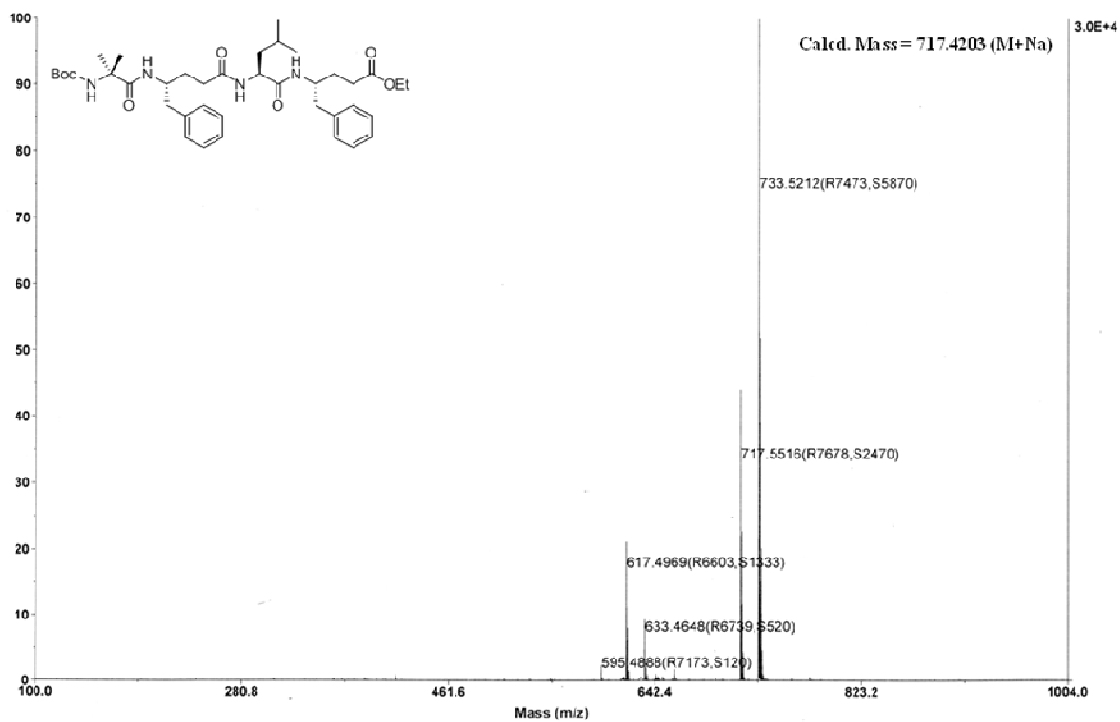



Mass spectrum of **Boc-Aib- $\gamma^4$ Phe-Leu- $\gamma^4$ Phe-Aib-dgF-OEt (P2)** acquired in a MALDI TOF/TOF spectrometer

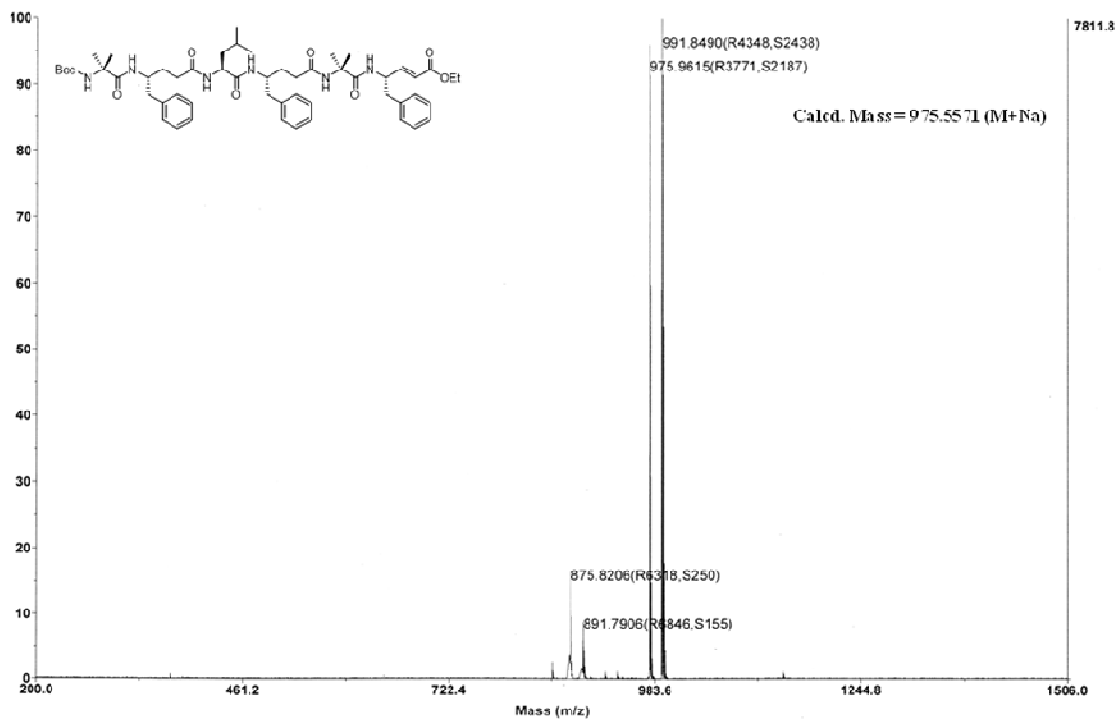

$^1\text{H}$  NMR spectrum of **Boc-Aib- $\gamma^4$ Phe-Leu- $\gamma^4$ Phe-Aib- $\gamma^4$ Phe-OEt (P3)** acquired in a 500 MHz spectrometer ( $\text{CDCl}_3$ )

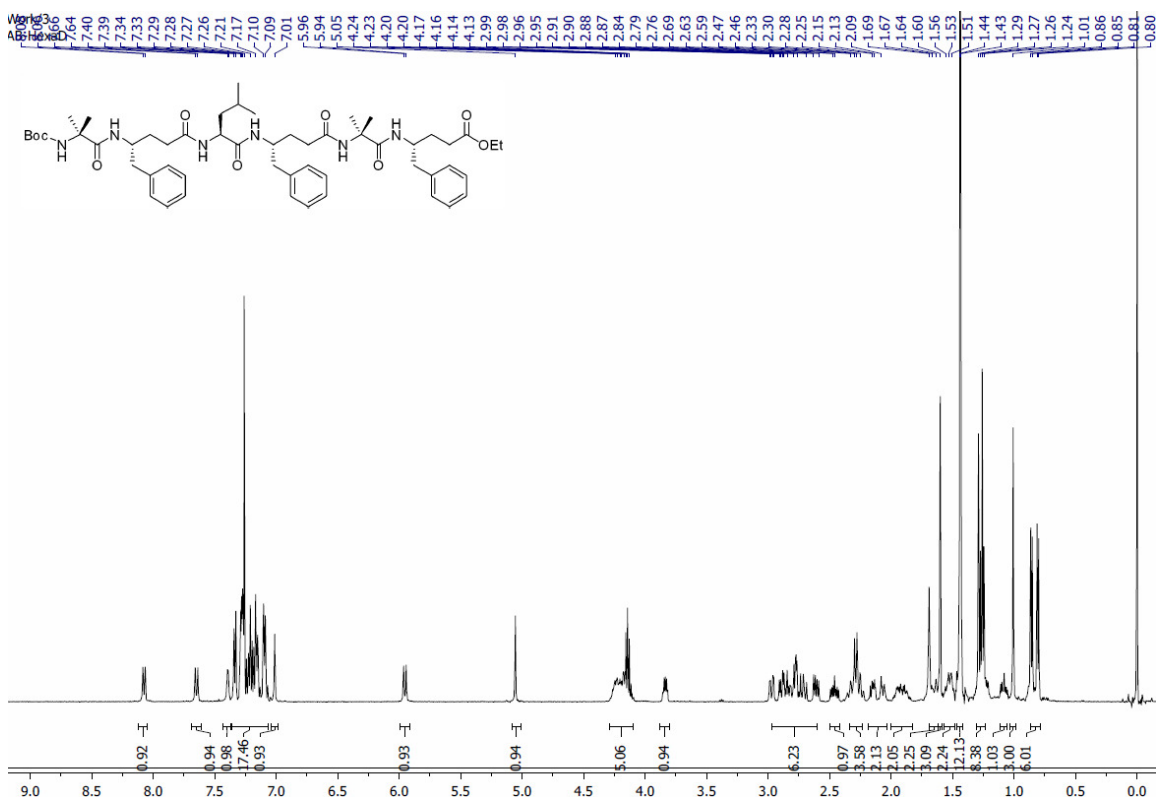

Supplement: c2cc32911e.pdf [file c2cc32911e.pdf]
